# Supplementary material for: U-Shaped association between apolipoprotein A1 and serum uric acid levels in patients with osteoporotic fractures: a cross-sectional study
Source: Front Endocrinol (Lausanne). 2025 Apr 22;16:1540879. doi: 10.3389/fendo.2025.1540879 (PMC12052554; doi:10.3389/fendo.2025.1540879)
Supplement: Supplementary file 2 [file Table1.xls]

ID	GENDER	AGE	MAINDIAGNOSIS	BMI	CCI	HYPERTENSION	DIABETES	ALT	AST	CR	ALBUMIN	UA	APOLIPOPROTEINA	RYQSTATIN
1197	0	75	72	19.6837980271159	0	1	0	11	18	72	35	656	1.01	0
1201	0	59	52	23.922422999701	0	0	0	24	25	44	42.2	172	1.36	0
1202	0	71	32	24.8357634994392	0	0	0	85	56	50	36.1	198	1.21	0
1217	0	72	72	26.1593341260404	0	0	0	15	19	72	40.5	335	1.45	0
1230	0	66	32	22.389947714623	0	1	0	13	20	58	39.9	282	1.23	0
1233	0	67	72	24.6710526315789	0	1	0	15	18	61	38.6	239	0.99	0
1242	0	81	72	21.0856401384083	0	0	0	14	14	41	41.5	218	1.7	0
1243	0	67	32	23.5555555555556	0	0	0	18	18	61	43.8	188	1.53	0
1248	1	74	72	18.2563187147552	1	0	0	37	26	69	39.6	373	1.08	0
1251	0	74	32	21.1111111111111	0	0	0	17	24	52	39	348	1.22	0
1252	1	64	22	19.3337299226651	0	0	0	11	12	48	41.9	253	1.44	0
1261	1	77	32	19.7055324211779	0	0	0	13	18	69	37.1	252	1.03	0
1264	0	75	72	27.766208524226	0	0	0	14	25	36	42.7	311	1.03	0
1265	0	62	52	27.8742236784195	0	0	0	15	23	47	44.2	347	1.62	0
1267	0	60	22	21.3675213675214	0	0	0	17	21	46	43	235	1.96	0
1268	0	72	72	25.2993759487266	0	0	0	14	26	66	42.7	227	1.23	0
1278	0	70	72	22.1002895900015	1	1	0	25	24	58	40	362	1.2	0
1279	0	88	72	26.0145681581686	0	0	0	15	14	48	38	166	0.93	0
1281	0	52	22	22.265625	0	0	0	13	19	48	35.8	277	1.02	0
1290	1	56	52	26.8923231381548	0	0	0	10	16	255	36.1	709	1.1	0
1301	1	75	32	22.3081499107674	0	0	0	32	26	64	38.1	322	0.88	0
1304	1	84	72	23.2445945353274	0	1	0	23	16	67	39.6	252	1.09	0
1310	0	73	72	24.2439184746877	0	0	0	30	23	63	44.6	329	1.33	0
1314	1	68	72	21.7079233920381	1	0	1	11	21	76	34.8	291	1.06	0
1317	1	84	72	24.8015873015873	0	0	0	11	13	863	42.2	331	1.98	0
1323	1	67	22	22.4765868886576	0	0	0	15	20	47	45.7	267	1.46	0
1324	1	60	52	26.609712545079	0	0	0	24	32	69	41	266	0.88	0
1327	0	71	52	20.7368827160494	0	0	0	17	29	61	43.2	308	0.96	0
1350	0	68	22	26.8614969135802	0	0	0	19	21	47	38.7	257	1.35	0
1353	0	54	22	23.046875	0	0	0	16	13	78	42.7	358	1.2	0
1359	0	68	32	21.9288627691768	0	0	0	18	19	53	34.8	264	1.17	0
1360	0	78	72	18.796189499765	0	0	0	22	17	43	41.1	253	1.64	0
1361	0	53	52	23.191094619666	0	0	0	31	33	73	41.7	332	1.12	0
1364	0	59	22	22.9157825701169	0	0	0	27	31	61	37.7	315	1.38	0
1370	1	90	72	22.65625	0	0	0	7	16	74	33.7	278	1.24	0
1372	0	85	72	25.2047889098929	0	1	0	10	17	50	37	194	1.16	0
1374	0	69	22	21.359306249733	0	1	0	17	28	109	37.6	348	1	0
1381	0	68	22	28.2289786662964	0	0	0	20	30	45	39.4	220	1.34	0
1390	0	61	22	25.6311674996796	0	0	0	27	23	96	44.8	394	1.51	0
1392	1	66	32	23.7386621315193	0	0	0	30	42	49	43	335	1.14	0
1395	0	60	72	26.6389177939646	0	0	0	21	27	41	45.4	215	1.41	0
1397	0	62	52	27.4076572777871	0	0	0	20	28	174	32.5	494	0.51	0
1398	0	66	32	20.8116545265349	0	0	0	19	22	75	38.7	391	1.08	0
1402	0	75	72	24.0778913205561	0	0	0	26	19	41	38.6	108	1.19	0
1413	0	52	32	35.8829482206106	0	0	0	12	20	51	37.8	294	0.93	0
1414	1	72	32	22.7183018288672	0	0	0	11	18	59	42.6	285	1.42	0
1415	0	62	32	21.875	0	0	0	37	45	71	49.4	487	1.09	0
1417	0	82	72	23.3088672882365	0	0	0	39	25	43	39.9	272	1.69	0
1423	0	68	72	27.025809648214	0	0	0	13	22	59	47	256	1.59	0
1425	0	68	72	21.3333333333333	0	0	0	68	83	73	37.1	140	1.06	0
1430	0	71	32	24.034609838167	0	0	0	11	35	73	39.3	416	1.3	0
1435	0	54	22	22.8623685413809	0	0	0	15	24	57	42.7	226	1.33	0
1439	0	74	72	28.7684804145709	1	0	1	15	14	117	38.9	258	1	0
1440	0	59	22	23.0222222222222	0	0	0	15	13	65	39	299	0.81	0
1442	0	80	22	31.640625	0	0	0	57	56	82	35.5	339	0.68	0
1446	0	63	22	24.8015873015873	0	0	0	16	17	74	46.7	321	1.18	0
1447	0	77	42	22.8299643281807	0	0	0	18	25	42	45.5	216	1.8	0
1449	0	75	52	27.5873260578522	0	0	0	48	38	62	39.2	209	1.2	0
1451	1	50	32	21.5138585105239	0	0	0	17	19	45	38.4	497	1.39	0
1456	0	66	32	30.3850156087409	0	1	0	69	103	67	36	288	1.17	0
1458	1	51	72	27.0640515887601	0	0	0	49	86	37	36.4	180	1.18	0
1467	0	68	52	23.7332384003797	0	0	0	21	46	63	37.1	328	1.88	0
1484	0	72	72	22.9719382009819	0	0	0	22	25	53	45	378	1.55	0
1486	1	64	72	21.7738423573813	0	0	0	23	25	47	44.2	184	1.33	0
1499	1	65	32	20.4294183624419	0	0	0	18	24	51	35.4	119	1.61	0
1510	1	76	72	26.1065622404177	0	0	0	11	19	72	35.6	252	1.45	0
1512	1	67	52	22.6532684429817	0	0	0	32	30	53	43.3	255	1.58	0
1515	0	86	52	24.5243463470591	0	0	0	42	42	69	43.6	353	1.01	0
1519	1	50	32	22.4081789853296	0	0	0	21	24	45	33.1	206	0.82	0
1523	1	66	22	25.0399187109885	0	0	0	24	31	59	38	204	1.06	0
1526	0	70	22	21.7964736915174	0	0	0	38	46	67	42.8	337	1.29	0
1527	1	66	72	20.84330811708	0	0	0	63	85	64	30.6	347	0.85	0
1533	0	74	72	25.7777777777778	1	1	1	25	21	56	43.1	292	1.09	0
1537	0	73	32	22.0740997229917	0	0	0	14	10	70	37.6	384	1.24	0
1540	0	79	32	21.0828132906055	0	0	0	22	20	58	40.2	342	0.87	0
1542	1	86	72	19.6505617497544	0	1	0	38	28	73	42.3	404	1.11	0
1543	0	68	72	17.578125	0	0	0	20	27	55	39.3	182	1.13	0
1548	1	60	32	24.6770213383655	0	0	0	18	22	79	39.5	228	1.04	0
1554	1	73	72	18.5567732222261	0	0	0	8	19	74	41.3	316	0.78	0
1555	1	89	72	21.484375	0	0	0	22	18	39	37.5	218	1.17	0
1565	0	66	22	24.034609838167	0	0	0	9	15	46	41.1	146	1.32	0
1570	0	72	22	24.0892369763854	0	0	0	13	20	62	40.1	147	1.27	0
1573	0	65	42	26.7759341149742	0	1	0	13	21	48	41.7	227	1.13	0
1578	0	74	22	25.9151279559443	0	0	0	15	20	38	41.3	199	1.35	0
1579	0	51	32	30.297783933518	0	0	0	14	18	64	37.3	300	1.03	0
1580	0	65	32	26.7094017094017	1	1	1	12	13	52	42.6	298	1.56	0
1584	0	68	52	19.7035091011447	0	0	0	13	12	38	41.3	301	0.88	0
1585	0	64	52	23.891779396462	0	0	0	12	17	46	40.3	173	1.36	0
1589	1	64	72	26.4380708219837	0	1	0	29	22	65	43.7	224	1.03	0
1594	1	63	32	24.9134948096886	0	0	0	30	49	83	37.7	285	1.33	0
1595	1	77	22	19.909972299169	0	0	0	9	18	44	48.4	200	1.19	0
1596	0	61	32	21.6041047799082	0	0	0	23	31	67	39.8	303	1.02	0
1601	0	65	32	24.8777196829145	0	0	0	17	25	94	44.8	395	1.27	0
1614	0	92	72	29.4250792213671	0	0	0	15	18	76	37.9	392	1.33	0
1629	0	72	22	18.5398778247683	0	0	0	25	20	70	43.1	436	1.19	0
1632	0	74	32	23.4565584537437	0	0	0	23	25	59	36.8	228	1.32	0
1635	0	87	72	20.5456936226167	0	0	0	13	22	58	38.6	241	1.52	0
1636	0	62	52	27.3922571219869	0	0	0	40	28	67	34.1	266	0.95	0
1637	1	78	22	26.4380708219837	0	0	0	18	18	77	34.9	344	0.81	0
1640	0	82	72	22.2707656241675	0	0	0	18	19	48	45.8	240	1.72	0
1642	0	75	32	27.6787389754175	0	0	0	19	21	55	41.8	189	1.33	0
1643	0	75	72	19.2276878705336	1	1	1	15	20	100	42.8	335	0.92	0
1650	0	66	42	23.422090729783	0	0	0	15	21	77	45.1	227	1.29	0
1651	0	82	52	26.9357195032871	0	0	0	24	20	47	44.6	168	1.5	0
1658	0	76	72	27.5862068965517	0	0	0	13	26	50	42.4	231	1.2	0
1662	0	83	72	19.909972299169	0	0	0	12	15	49	37.4	180	1.43	0
1665	1	65	32	25.279226917825	0	0	0	13	28	78	39.3	269	1.05	0
1668	0	91	22	21.2084487534626	1	1	0	23	19	41	42.4	239	1.24	0
1669	0	57	32	24.0344071512903	0	0	0	14	21	60	37.6	257	1.03	0
1683	0	85	72	24.2954324586978	0	0	0	27	20	64	40.2	516	0.91	0
1684	0	69	52	23.3055885850178	0	0	0	15	55	56	41.6	303	1.09	0
1688	0	89	72	22.8299643281807	0	0	0	29	47	53	32.4	193	1.12	0
1690	0	59	32	22.3756799506192	0	0	0	38	25	61	43.3	277	1.21	0
1706	1	60	72	19.0519737844841	0	1	0	26	23	65	33.7	289	0.93	0
1710	0	74	72	25.6837098692033	0	0	0	33	27	42	39.4	198	1.55	0
1712	0	91	32	25.6311674996796	0	0	0	14	17	46	37.4	332	1.7	0
1724	0	77	32	26.775172879069	0	0	0	10	20	76	33.3	176	1.16	0
1726	0	59	32	24.609375	0	0	0	26	27	50	40	250	1.07	0
1727	0	79	72	23.8727985225891	0	1	0	12	14	103	35.1	290	0.78	0
1730	0	82	42	19.4771468144044	0	1	0	53	47	59	40.5	272	0.83	0
1733	0	61	32	24.2011366630283	2	0	1	12	21	60	48.2	109	1.22	0
1737	0	71	52	25.2363403300753	0	0	0	33	35	48	38.3	153	1.16	0
1752	0	90	72	21.5800337774442	0	0	0	17	21	58	42.9	252	1.24	0
1754	0	85	72	22.2222222222222	0	0	0	20	24	52	41.8	290	1.42	0
1757	1	68	72	19.252619618735	0	0	0	12	18	57	39.5	406	0.96	0
1765	1	63	52	22.6337448559671	0	0	0	76	42	64	46.6	379	0.88	0
1768	0	64	22	21.0517082584097	0	0	0	16	20	51	39.9	501	2.31	0
1770	0	80	32	27.3034383821556	0	0	0	20	25	50	42.7	204	1.41	0
1771	0	75	32	26.6161431701972	0	0	0	23	18	60	41.6	274	1.45	0
1775	0	83	42	27.1040743827025	0	1	0	25	22	49	41	248	1.3	0
1778	1	78	72	18.359375	0	0	0	15	14	62	40.5	298	1.08	0
1781	0	71	72	21.484375	0	0	0	20	20	46	41.2	229	0.96	0
1785	0	53	22	24.9158788655664	0	0	0	25	28	83	45.6	369	1.15	0
1788	0	69	72	20.0986111633859	0	0	0	13	19	213	34.2	338	0.9	0
1790	0	76	72	30.780907404284	0	1	0	17	22	85	44.8	309	1.32	0
1799	0	81	72	20	0	0	0	13	19	64	42.7	209	0.99	0
1801	1	83	72	20.5688066136624	0	0	0	19	23	61	37.5	313	0.99	0
1810	0	83	72	21.0007304601899	0	0	0	88	77	72	41	481	1.4	0
1824	0	64	52	22.8928199791883	1	0	0	12	15	85	34.7	292	1.14	0
1827	0	60	72	20.2847985719502	0	0	0	25	22	59	43	467	1.37	0
1828	0	62	42	22.8328793462586	0	0	0	13	18	103	34.2	326	0.82	0
1830	0	55	32	24.034609838167	0	0	0	23	20	74	25.6	340	0.74	0
1832	0	80	22	24.1436547457371	0	0	0	18	17	60	39.7	232	1.19	0
1833	1	78	72	21.6572842339274	0	1	0	22	29	60	39.7	251	1.11	0
1834	0	76	32	19.8178444931692	0	0	0	15	19	74	38.7	333	1.38	0
1836	0	69	72	24.8888888888889	0	0	0	32	23	53	42.1	270	1.46	0
1837	1	73	72	21.7180660897457	0	0	0	21	22	90	32.2	325	1.13	0
1841	1	65	32	26.2335558041742	0	0	0	17	16	57	43.1	215	1.23	0
1842	1	59	52	24.3865264441396	0	0	0	39	22	97	41.9	296	1.25	0
1844	1	67	32	30.078125	0	0	0	141	73	42	47.4	204	1.29	0
1848	1	66	32	25.4523578138738	0	0	0	13	23	61	32.3	161	1.04	0
1851	1	81	72	21.9671201814059	0	0	0	65	27	74	47.6	492	1.13	0
1860	0	69	32	25.203981374685	0	0	0	10	16	55	38.2	298	1.2	0
1861	0	63	52	24.4560634171024	0	0	0	13	21	76	35.6	306	0.63	0
1862	1	87	72	23.6340330075308	0	0	0	26	26	46	40.9	419	1.16	0
1863	0	58	72	22.7694383538539	0	0	0	15	21	35	37.5	233	1.32	0
1866	0	71	32	23.4492271491744	0	0	0	6	27	38	39.3	175	1.14	0
1867	1	75	32	20.4896958189945	0	0	0	13	29	57	36.9	207	1.09	0
1869	0	64	52	22.265625	0	0	0	21	16	88	44.9	220	1.17	0
1874	1	67	72	31.1437074829932	1	1	1	16	24	36	40.9	212	1.9	0
1878	0	80	72	23.7812128418549	0	0	0	30	33	51	34	215	1.65	0
1881	0	76	32	18.9745319615449	0	0	0	36	34	63	35.6	297	1.1	0
1884	0	70	42	24.0054869684499	0	0	0	5	12	73	46.3	285	1.07	0
1891	0	74	72	19.8178444931692	0	1	0	25	22	65	45.9	359	1.62	0
1892	0	64	72	25.536703601108	0	0	0	45	37	74	39	481	0.89	0
1893	0	60	72	25.6311674996796	0	0	0	19	17	55	38.8	309	2.04	0
1896	0	69	72	32.3109567901235	0	0	0	17	21	40	42.2	244	1.24	0
1901	1	66	22	26.3979773944081	0	1	0	26	27	62	50.8	232	1.41	0
1909	0	59	32	22.060353798127	1	0	1	13	11	63	41.7	299	1.39	0
1911	1	64	72	22.3081499107674	1	1	0	14	21	58	42.9	241	1.19	0
1917	0	83	72	23.5939643347051	0	1	0	27	29	59	39.8	250	0.96	0
1918	0	65	32	22.189349112426	1	0	1	15	16	60	38	405	1.13	0
1919	0	81	72	21.4030915576694	0	1	0	19	26	67	44	226	1.56	0
1920	0	69	22	24.4510734021224	0	0	0	19	18	52	46.7	214	1.15	0
1925	1	72	22	25.390625	0	1	0	15	20	78	44.4	314	1.07	0
1928	0	58	32	17.9591836734694	0	0	0	58	52	38	40.8	419	1.2	0
1936	0	73	72	30.7004078768475	1	1	1	12	20	44	39.7	218	0.77	0
1946	1	62	32	28.1624937309517	1	1	1	13	24	126	37.5	402	1.07	0
1952	0	65	32	24.8888888888889	0	1	0	22	31	45	44.3	236	1.32	0
1959	0	65	52	25.7777777777778	0	1	0	20	30	71	45.2	344	1.38	0
1960	0	78	72	18.2615047479912	0	1	0	17	20	48	39.3	227	1.7	0
1962	1	53	32	19.8176773682124	0	0	0	26	34	57	41.8	233	1.04	0
1965	0	75	72	19.1111111111111	0	0	0	18	13	32	38.6	196	1.03	0
1967	1	74	32	21.7738423573813	0	0	0	25	30	82	44.5	361	1.29	0
1969	0	64	52	21.6412742382271	0	0	0	38	20	47	36.3	343	1.18	0
1970	1	68	72	19.6505617497544	2	0	0	6	28	49	43.1	258	1.5	0
1973	0	69	32	22.0292912491379	0	0	0	36	31	57	41.6	304	1.38	0
1978	0	63	52	20.077747874749	0	0	0	11	27	60	39.8	230	1.27	0
1983	0	87	72	24.5243463470591	0	0	0	18	46	73	43.2	151	1.24	0
1986	0	90	72	20.8116545265349	0	0	0	12	28	80	36.4	260	0.99	0
1990	0	69	42	27.576319784112	0	1	0	24	32	46	45.8	266	1.48	0
1991	1	59	52	25.390625	0	0	0	24	26	88	36.5	468	1.03	0
1994	0	66	32	23.4337445922128	0	0	0	25	25	60	46.6	306	0.61	0
1995	0	69	32	23.2445945353274	0	0	0	23	34	89	33.8	334	0.93	0
1996	0	83	52	24.3007339813529	0	0	0	33	29	40	42.6	260	1.08	0
2018	0	89	72	20.2454887769573	0	0	0	22	27	54	42	285	1.39	0
2029	1	54	72	20.5150864789799	0	0	0	9	23	45	41.1	243	1.28	0
2031	0	66	32	22.6799524092802	0	0	0	204	127	78	46.7	394	1.28	0
2033	1	80	72	26.0261748958953	2	1	1	12	18	74	34.7	317	1.09	0
2036	0	81	72	21.7738423573813	0	1	0	21	14	40	40.1	219	1.26	0
2037	0	77	52	24.0138408304498	0	0	0	20	23	56	39.3	320	0.92	0
2039	0	67	32	24.5577523413111	0	0	0	19	23	59	38.4	248	1.14	0
2040	0	67	22	20.3159240321402	0	0	0	46	30	48	39.9	299	1.73	0
2043	1	72	32	21.5044695564176	0	0	0	15	21	43	40.1	210	1.37	0
2045	1	65	52	24.1671624033313	0	0	0	18	15	66	38.1	221	0.77	0
2047	0	70	72	28.6325802615933	2	0	0	21	28	58	40.5	262	1.2	0
2048	1	85	72	23.9188302920412	0	0	0	24	29	59	41.8	188	1.55	0
2049	0	65	72	26.1426884803508	0	0	0	16	29	57	32.4	215	1.23	0
2051	0	56	22	24.034609838167	0	0	0	50	23	61	40.1	396	1.2	0
2057	0	87	72	23.8054016620499	0	1	0	12	18	53	41.9	264	1.51	0
2063	0	84	52	26.4023545706371	0	0	0	21	26	51	49.3	197	1.85	0
2064	1	62	32	24.2382271468144	0	0	0	22	21	64	39.9	240	1.17	0
2070	0	92	72	20.2847985719502	0	0	0	29	25	97	40	351	0.97	0
2071	0	85	72	27.1917898337792	0	0	0	18	26	64	28.1	198	0.85	0
2079	0	67	42	25.1821019771072	1	1	0	16	20	58	51.5	434	1.15	0
2080	0	85	72	19.9791883454735	0	0	0	19	15	61	41.5	219	1.09	0
2082	0	66	32	27.6887781337764	0	0	0	25	21	61	42.5	249	1.12	0
2099	0	74	72	31.1634349030471	1	0	0	27	16	64	39.5	264	1.03	0
2101	0	81	52	29.5918367346939	0	0	0	21	21	47	44.2	372	1.79	0
2106	0	55	52	24.9199003203987	0	0	0	12	16	69	34.3	312	1.02	0
2107	0	69	22	21.1620644312952	0	0	0	17	23	60	44.5	298	1.28	0
2109	0	61	32	24.7409372871024	0	0	0	28	23	60	40.6	275	1.43	0
2131	0	66	72	23.1344510190664	1	0	1	13	14	48	37.4	175	1.46	0
2134	0	53	72	21.3675213675214	0	0	0	12	18	44	47.1	196	1.47	0
2135	1	55	52	24.4472789115646	0	0	0	31	42	70	41.8	268	1.17	0
2136	1	63	52	22.3487994936909	0	0	0	35	19	62	43.5	311	1.08	0
2138	0	82	52	22.3543400713436	0	0	0	21	17	85	41.7	403	1.17	0
2142	0	66	22	23.9188302920412	0	0	0	22	23	41	43.2	202	1.5	0
2145	0	75	32	23.4375	0	1	0	16	21	48	35.5	79	1.09	0
2151	0	73	42	27.1111111111111	1	0	1	18	15	58	44.5	175	1.34	0
2152	0	67	42	31.2385898008033	1	1	1	12	24	200	34	410	1.04	0
2156	1	70	32	21.6712580348944	0	0	0	14	20	60	40.2	126	1.25	0
2158	1	70	32	21.6441207075963	0	0	0	13	22	79	40.2	399	1.22	0
2163	0	84	72	18.75	0	0	0	17	25	56	37.4	209	0.97	0
2164	0	64	52	23.7332384003797	0	0	0	7	14	42	48.6	193	1.33	0
2171	0	61	52	25.6076388888889	0	0	0	26	38	53	35.1	197	1.25	0
2175	1	69	22	26.7094017094017	0	1	0	22	19	73	42.8	328	1.02	0
2178	0	65	52	32.7648891966759	0	0	0	19	32	54	41.9	358	1.39	0
2189	0	54	22	27.2173029467267	0	0	0	22	17	51	38.6	238	1.42	0
2191	0	81	72	24.65483234714	1	0	0	19	15	100	47.3	380	1.07	0
2192	0	65	22	25.3330831300432	0	0	0	27	36	93	33.9	445	1.17	0
2194	0	76	32	24.1436547457371	0	0	0	13	19	57	36.4	215	1.09	0
2195	0	61	52	24.9989035568615	0	0	0	37	65	70	42.7	387	1.07	0
2196	0	63	32	22.4323025156225	0	0	0	36	24	61	38.8	339	0.92	0
2197	0	67	52	24.7767952496903	0	0	0	14	17	43	40.3	493	1.37	0
2199	0	88	72	20.5456936226167	0	0	0	39	29	58	42.5	132	1.38	0
2220	1	61	52	26.346494034401	0	0	0	17	26	57	35.3	423	1	0
2222	0	64	52	22.9397506925208	0	0	0	15	19	65	36.4	342	1.34	0
2224	0	62	32	25.9313215400624	0	0	0	28	54	77	35.5	255	1.06	0
2234	1	85	72	23.191094619666	0	0	0	33	50	89	36.6	356	1.02	0
2236	1	68	72	20.829995193078	1	1	1	32	23	69	39.1	239	1.32	0
2237	0	75	22	27.5738940686372	0	0	0	11	17	81	37.5	362	1.19	0
2245	0	62	32	23.1404958677686	0	0	0	17	18	44	39.5	157	1.19	0
2250	0	80	52	21.3675213675214	0	0	0	13	24	120	42.5	598	1.27	0
2252	0	94	72	23.8751147842057	0	0	0	16	19	38	48.3	271	1.16	0
2254	0	60	52	24.4444444444444	0	0	0	32	28	59	43.3	264	1.62	0
2256	1	58	52	24.8163265306122	0	0	0	12	19	48	41.7	196	1.3	0
2258	0	73	22	29.4758426246316	0	1	0	30	16	52	43.7	224	1.1	0
2267	0	68	72	24.1964937910884	0	0	0	20	19	52	46.4	291	1.4	0
2270	0	91	72	23.8763376932224	1	1	1	16	14	34	37.2	243	1.04	0
2274	0	66	22	19.9791883454735	0	0	0	9	14	41	34.6	175	1.09	0
2278	0	54	72	18.4265342092613	0	0	0	13	14	36	35.6	212	0.97	0
2292	0	60	72	21.9261258222297	0	0	0	26	21	66	46.3	261	1.23	0
2301	0	60	22	26.5643447461629	0	0	0	14	16	59	40.5	210	1.36	0
2303	1	88	42	20.5456936226167	0	0	0	15	16	60	38.3	299	1.02	0
2307	0	85	72	22.8299643281807	0	0	0	17	27	63	44.4	303	1.8	0
2311	0	76	22	26.4791818845873	0	0	0	20	16	52	39.8	229	1.28	0
2314	0	66	72	23.2334561768947	0	0	0	41	41	56	39.3	255	0.83	0
2320	0	60	32	22.1510225070211	0	0	0	12	19	52	45	216	1.12	0
2330	1	66	32	21.484375	0	0	0	22	19	103	40.2	282	1.21	0
2334	0	62	72	25.7210322145387	0	0	0	21	11	63	36.9	306	0.66	0
2337	0	86	32	25.203981374685	0	0	0	8	11	113	39.1	353	1.81	0
2345	1	71	42	24.0344071512903	0	0	0	10	16	93	45.2	344	0.95	0
2349	0	82	72	25.203981374685	0	0	0	27	22	40	41.1	195	1.28	0
2350	1	63	72	21.6712580348944	0	0	0	5	14	59	39.2	230	1.14	0
2351	0	67	22	24.0344071512903	0	0	0	14	23	79	35.1	399	0.89	0
2353	0	85	72	20.8888888888889	0	0	0	11	16	388	32.9	363	1.43	0
2354	1	79	72	27.1808999081726	1	1	1	28	22	67	39.7	321	1.18	0
2356	0	84	22	19.7602850664075	0	0	0	35	66	70	36	465	1.54	0
2358	1	67	72	24.0882231171666	0	0	0	28	30	55	48.2	375	1.4	0
2367	0	83	32	25.1095690284879	0	1	0	58	36	40	43.6	250	1.47	0
2368	0	61	22	24.21875	0	0	0	32	29	63	38.9	302	1.44	0
2373	0	53	32	26.0348632944462	0	0	0	13	18	54	46.8	406	1.38	0
2377	1	66	72	23.4375	1	0	0	27	25	140	34.5	399	0.95	0
2387	0	62	32	28.6170013135673	0	0	0	12	19	58	40.7	239	1.9	0
2388	0	72	72	24.0138787436085	1	1	0	22	16	47	38.9	230	1.73	0
2389	0	55	72	22.77318640955	3	0	0	35	26	45	44.5	294	1.22	0
2394	0	71	72	20.3618862510991	0	0	0	22	18	61	46.4	197	1.14	0
2395	0	77	72	27.0551508844953	0	0	0	18	21	76	45.9	336	1.37	0
2397	0	80	22	20.1342281879195	0	0	0	22	25	45	41	333	0.99	0
2398	0	57	22	24.5577523413111	0	0	0	22	25	81	39.4	254	1.15	0
2402	0	91	72	26.6666666666667	0	0	0	14	15	46	39.7	316	1.07	0
2403	0	80	42	19.818927075357	0	0	0	14	24	67	43	434	1.25	0
2404	0	62	72	21.3039485766759	0	0	0	10	18	73	37.4	236	1.24	0
2409	0	68	32	25.711008267078	0	0	0	18	18	76	43	319	1.11	0
2411	0	62	32	26.2719466871716	0	0	0	21	17	44	40.6	279	1.4	0
2416	0	64	72	20.0842241658568	0	0	0	14	24	47	42.1	279	1.76	0
2418	1	72	72	17.7462289263532	0	1	0	14	19	84	36.2	320	1.02	0
2421	0	51	52	28.2396512480228	0	0	0	25	24	65	41.2	253	1.08	0
2424	0	55	52	29.7210791037952	0	0	0	20	21	34	42.4	313	1.34	0
2425	0	60	22	20.234375	0	0	0	23	21	95	42.8	226	1.17	0
2426	1	63	32	27.7670981246529	0	0	0	14	17	58	36.7	232	1.02	0
2428	0	61	32	22.8928199791883	0	0	0	9	11	64	35.3	141	1.56	0
2430	0	80	32	26.2222222222222	0	0	0	25	23	53	40.3	225	1.48	0
2432	0	71	72	25.3515625	1	0	1	19	18	57	43.7	162	1.19	0
2433	1	88	72	30.8630068284403	0	0	0	27	25	56	38	181	1.25	0
2437	0	85	32	22.4323025156225	0	0	0	21	29	81	40.2	261	1.55	0
2442	1	94	72	28.3987180007303	0	1	0	22	16	58	39.6	300	1.51	0
2443	1	73	72	22.2222222222222	0	0	0	14	16	49	40.4	178	1.07	0
2450	0	55	22	21.7380052792299	0	0	0	23	22	41	45	249	1.88	0
2452	0	83	52	25.3515413737155	0	0	0	21	19	53	38.5	387	1.32	0
2453	0	73	32	23.0111768573307	0	0	0	22	23	73	37.4	203	1.16	0
2454	0	50	72	22.9397506925208	0	0	0	17	28	62	44.8	398	1.43	0
2466	0	69	42	25.0612608598797	0	0	0	16	19	37	41.1	131	1.14	0
2468	0	63	32	16.4283400435004	0	0	0	30	23	42	48.6	310	1.74	0
2475	0	56	72	28.2289786662964	0	0	0	12	19	57	45.7	352	1.54	0
2477	0	52	72	18.491124260355	0	0	0	7	12	72	30.4	387	0.87	0
2478	0	67	32	24.2214532871972	0	0	0	24	26	67	36.6	299	1.27	0
2480	0	78	32	22.2222222222222	0	0	0	35	75	48	40.4	245	1.68	0
2483	0	54	32	24.8015873015873	0	0	0	17	24	72	36.6	298	1.29	0
2484	0	55	52	23.3725761772853	0	0	0	18	29	50	43	218	1.44	0
2485	0	53	72	22.5827091723437	0	0	0	47	34	65	39.7	215	1.07	0
2487	0	71	22	20.0617283950617	0	1	0	51	30	49	40.5	166	1.19	0
2488	0	64	22	22.8630196590325	0	0	0	35	22	72	37.3	345	1.02	0
2491	0	71	22	27.5555555555556	0	0	0	11	16	37	37.9	136	1.25	0
2492	1	85	72	21.6412742382271	0	0	0	19	16	44	37.7	213	1.36	0
2493	1	77	72	26.5239197530864	0	0	0	22	28	53	39.3	214	1.33	0
2497	0	67	22	18.3654729109275	0	0	0	18	20	89	43.1	375	1.26	0
2499	1	71	32	22.31700059512	0	0	0	47	26	47	39.7	141	1.22	0
2510	0	83	42	18.0737217598098	0	0	0	20	28	56	41.4	325	1.49	0
2512	1	62	32	23.5303663434622	0	0	0	18	20	78	38.8	410	1.09	0
2519	0	84	72	24.8758211825028	3	0	0	10	15	67	39.1	239	0.88	0
2532	1	81	72	28.7641341003769	0	0	0	33	28	70	40.7	328	1.18	0
2538	0	72	22	24.7675659198293	0	0	0	26	17	75	42	353	1.38	0
2542	0	64	22	22.3132784291452	0	0	0	22	21	67	47.3	308	1.02	0
2544	1	81	32	21.2765957446809	0	0	0	13	14	51	42.8	299	1.56	0
2550	0	80	22	28.9993074792244	0	0	0	18	20	72	38.6	357	1.04	0
2551	0	55	22	20.6904945433892	0	0	0	16	30	55	35.9	320	1	0
2560	0	81	72	24	0	0	0	25	31	63	36.7	309	1.1	0
2570	0	78	22	18.732782369146	0	0	0	19	20	79	36.8	248	1.15	0
2575	0	76	72	24.023808670085	1	1	0	15	18	79	37.6	342	1.29	0
2579	1	89	72	26.2222222222222	0	1	0	19	23	54	39.7	208	1.23	0
2581	0	81	72	25	1	0	0	54	40	81	41.7	302	1.28	0
2583	1	86	72	18.9745319615449	0	0	0	15	21	59	34.8	223	1.17	0
2586	0	66	32	22.9397506925208	0	0	0	27	26	49	36.8	330	0.99	0
2590	0	73	72	23.458562375267	0	0	0	21	24	75	37.5	274	1.18	0
2592	0	96	72	22.1453287197232	1	0	0	9	15	98	37	406	0.91	0
2601	0	68	52	23.191094619666	0	0	0	15	19	54	43.2	293	1.2	0
2602	0	92	72	20.8890059844179	0	1	0	18	27	37	37	233	1.09	0
2603	1	68	22	22.3674400245603	1	0	0	47	42	41	46.7	253	1.24	0
2606	1	73	32	23.1385071035217	0	0	0	15	16	58	36.4	414	1	0
2608	0	79	32	26.0383789925514	0	0	0	16	34	67	41.3	363	1.22	0
2610	0	61	32	18.2863315458509	0	0	0	35	49	133	41	419	1.11	0
2611	0	80	32	22.6002629848784	0	1	0	10	12	67	41	254	1.02	0
2617	0	66	32	22.3948060486522	0	0	0	23	24	93	45.3	427	1.26	0
2623	0	72	22	21.0828132906055	0	0	0	34	41	72	35.6	522	1.11	0
2625	0	77	32	21.7554685336814	0	0	0	17	24	91	36.7	212	1.21	0
2627	0	80	72	24.7736588441962	0	0	0	18	23	46	39.2	167	1.19	0
2628	0	57	32	24.8409800895781	0	0	0	44	23	62	44.4	401	1.82	0
2634	0	76	72	21.5800337774442	1	1	1	15	15	47	38.7	316	0.92	0
2635	0	72	72	23.7118446309609	0	0	0	11	24	43	35.1	161	1.17	0
2642	0	78	32	20.9366391184573	0	0	0	18	23	48	40.8	145	1.3	0
2643	0	64	52	22.6367728531856	0	0	0	38	37	51	40.2	398	1.89	0
2645	1	66	72	22.1367397300044	0	0	0	26	26	67	36.9	297	1.51	0
2655	1	56	72	20.4467420238417	0	0	0	13	14	42	41.9	170	1.37	0
2674	0	87	52	16.1712247324614	0	0	0	17	24	49	40.3	266	1.63	0
2675	0	55	72	23.3055885850178	0	0	0	19	24	63	39.3	243	1.63	0
2681	0	66	42	27.281746031746	0	0	0	22	25	37	43.7	219	1.3	0
2689	0	73	32	25.0657462195924	0	0	0	12	23	72	39.5	288	1.17	0
2693	1	62	72	22.4913494809689	0	0	0	15	25	73	41.9	328	1.02	0
2704	0	56	32	27.5862068965517	0	0	0	10	18	60	41.3	175	1.24	0
2707	0	82	32	22.8928199791883	0	0	0	22	20	71	40.7	212	1.16	0
2708	0	90	72	21.6712580348944	0	0	0	69	34	81	42.1	584	0.98	0
2709	0	80	72	27.766208524226	0	1	0	10	17	82	36.8	363	1.08	0
2713	1	74	22	25.5661066471877	0	0	0	19	26	36	42.1	212	1.54	0
2715	0	55	32	24.8639519609683	8	1	0	23	27	60	34.9	257	1.07	0
2718	0	78	32	18.5123966942149	0	0	0	13	20	53	39.9	304	1.89	0
2720	1	73	72	27.0051309748852	1	1	0	19	23	62	45.6	372	1.2	0
2725	0	67	42	23.0680507497116	0	0	0	20	17	82	39.4	373	0.93	0
2728	0	68	32	16.6468489892985	0	0	0	11	18	63	45.6	284	1.26	0
2729	0	62	22	22.4996371026274	0	0	0	13	24	50	36.3	308	1.49	0
2732	0	74	32	19.9593554942662	0	0	0	23	20	78	47.6	402	1.73	0
2738	0	67	22	22.8630196590325	0	0	0	22	22	38	43.9	259	1.92	0
2740	0	71	32	21.2305720237141	0	0	0	31	25	71	44.2	351	1.17	0
2756	0	75	52	28.5354154266307	0	0	0	16	15	59	36.2	160	1.14	0
2758	1	60	32	18.3654729109275	0	0	0	26	28	58	44.9	244	1.47	0
2760	0	56	32	25.9515570934256	0	0	0	36	72	70.4	28.7	280.4	0.96	0
2761	0	79	72	18.9842209072978	0	0	0	30	29	126	36.8	442	1	0
2764	0	62	42	22.9397506925208	0	0	0	17	22	45	39.7	168	1.07	0
2765	0	56	22	23.5157497459718	0	0	0	19	19	31	38.6	175	1.24	0
2766	1	61	32	20.0474456213038	0	0	0	14	9	32	45.4	262	0.9	0
2767	0	50	32	20.0288415318058	0	0	0	17	23	43	42.1	263	1.3	0
2770	0	67	32	21.6412742382271	0	0	0	26	20	50	45.8	389	1.21	0
2771	0	79	72	22.6757369614512	0	1	0	13	21	37	43.7	261	1.44	0
2773	0	54	22	25.6311674996796	0	0	0	71	37	60	48.1	422	1.3	0
2790	0	82	72	25.0360519147573	0	0	0	29	23	81	39.3	320	1.07	0
2794	1	91	72	17.9391227190309	0	0	0	17	38	122	41.9	326	1.62	0
2801	0	85	22	22.3214285714286	0	0	0	8	17	80	32.8	296	1.11	0
2806	0	61	32	25.0761930481077	0	0	0	23	28	92	41.5	538	1.36	0
2807	0	69	32	23.2334561768947	0	0	0	19	33	112	40.7	469	1.68	0
2809	0	80	32	19.9791883454735	0	0	0	11	17	90	35.7	223	0.91	0
2811	1	53	72	22.7233379501385	0	0	0	30	29	48	41.5	268	1.09	0
2814	1	68	72	21.9261258222297	0	0	0	23	22	64	39.1	202	1.09	0
2815	0	86	72	18.0737217598098	0	0	0	8	15	52	43.2	223	1.39	0
2820	1	53	72	16.8662506324844	0	0	0	15	19	82	40.3	389	1.62	0
2822	0	74	32	24.3141239657425	0	0	0	11	16	115	35.5	583	1.29	0
2824	0	80	72	25.5937370619895	0	0	0	13	13	45	38.5	193	1.58	0
2827	1	52	72	19.0443213296399	0	0	0	18	25	66	39.6	206	1.3	0
2831	0	75	22	21.875	0	0	0	16	33	57	41	297	1.23	0
2833	0	65	42	23.3886865581877	0	0	0	39	30	78	45	438	1.13	0
2835	0	61	32	26.1593341260404	0	0	0	20	26	50	36.3	149	1.08	0
2844	0	67	52	26.5983015542381	0	0	0	59	45	59	39	213	1.22	0
2847	0	68	22	24.9991246805084	0	0	0	20	22	60	37.2	309	1.23	0
2851	0	63	52	20.4440763935614	0	0	0	26	46	57	40.1	360	2.49	0
2852	0	67	32	26.4791818845873	0	0	0	17	13	43	39.2	270	1.06	0
2854	0	84	72	24.034609838167	0	1	0	14	15	90	41.7	267	1.09	0
2864	0	55	32	20.7167933335905	0	0	0	20	21	69	41.6	278	1.21	0
2865	0	67	52	21.484375	0	0	0	15	14	50	42.7	207	1.04	0
2867	0	77	72	20.077747874749	0	0	0	21	28	77	44.4	481	1.08	0
2869	1	59	52	20.8116545265349	0	0	0	15	19	53	37.6	273	0.92	0
2872	1	61	52	19.2973992368756	0	0	0	19	15	56	46.7	311	1.78	0
2879	0	70	52	25.5661066471877	1	0	1	13	12	62	43.9	275	1.16	0
2880	0	53	32	23.6634814049587	0	0	0	14	22	66	34.4	222	1.08	0
2882	0	66	22	26.25	1	0	1	15	14	65	37.1	371	0.82	0
2885	0	81	72	26.1426884803508	0	0	0	11	18	68	38.3	309	1.2	0
2888	0	63	32	19.6282647011697	0	0	0	14	15	84	41.9	327	1.46	0
2891	0	69	72	23.422090729783	0	0	0	27	25	69	37.1	255	1.09	0
2896	1	51	52	27.6646043961571	0	0	0	13	13	67	31.7	174	1.04	0
2897	1	64	32	23.6831717907109	0	0	0	15	18	107	35.1	484	1.21	0
2904	0	66	32	24.4646016033724	0	1	0	21	22	59	40.9	273	1.04	0
2906	1	85	72	22.1453287197232	0	0	0	10	21	69	44.4	366	1.17	0
2913	0	53	72	18.9745319615449	0	0	0	14	24	62	37.5	364	1.96	0
2929	0	75	22	23.2834185536888	0	0	0	28	18	107	32.4	492	0.93	0
2931	0	76	72	22.3132784291452	0	0	0	20	24	74	42	241	1.15	0
2938	0	86	72	21.2765957446809	0	1	0	14	13	42	45.3	388	1.65	0
2950	1	50	72	24.0882231171666	0	0	0	26	29	51	43.6	459	1.35	0
2952	0	87	72	24.3948207918934	0	0	0	19	17	82	42.1	331	1.42	0
2958	0	71	72	21.484375	1	0	1	10	20	71	40.6	151	1.33	0
2962	0	62	32	28.9993074792244	0	0	0	14	21	62	49	222	1.48	0
2964	0	62	32	21.6412742382271	0	0	0	12	27	67	38.8	356	0.93	0
2976	1	76	72	21.3382106386222	0	0	0	33	29	57	44.9	396	1.2	0
2998	1	82	72	21.9261258222297	0	1	0	8	14	89	34.2	232	0.79	0
3024	0	65	72	24.8602892833662	0	0	0	35	58	43	32.8	238	1.04	0
3027	1	66	32	19.3771626297578	0	0	0	9	17	80	39.5	359	1.23	0
3030	0	84	72	24.4444444444444	0	1	0	32	34	68	36.2	362	1.13	0
3031	1	65	72	17.258382642998	0	1	0	18	29	78	33.6	198	1.22	0
3035	1	78	72	17.578125	0	0	0	26	20	54	44	332	1.15	0
3038	0	69	22	18.1786703601108	1	0	1	11	18	45	39.1	345	1.72	0
3039	0	89	32	22.9591836734694	0	0	0	15	18	54	41.4	167	1.35	0
3040	0	65	32	24.609375	0	0	0	20	15	98	29.4	278	0.86	0
3041	1	87	72	24.8015873015873	0	1	0	18	19	53	47.3	444	1.13	0
3043	0	54	32	27.34375	0	0	0	38	33	90	45.4	447	1.16	0
3044	0	53	32	21.8299521999323	0	0	0	17	24	42	40.4	247	1.42	0
3045	1	83	72	20.7612456747405	0	0	0	18	33	89	43.2	426	1.4	0
3046	0	68	32	26.7094017094017	1	0	1	19	18	74	40	343	1.41	0
3050	0	68	52	27.34375	0	0	0	20	17	60	34.8	342	1.1	0
3057	0	71	32	24.034609838167	0	0	0	11	17	64	40.3	124	1.26	0
3058	0	52	72	24.023808670085	0	1	0	13	24	64	25.6	173	0.83	0
3063	1	72	32	21.9671201814059	0	0	0	10	12	74	29.8	201	0.92	0
3066	1	69	32	25.3515413737155	0	0	0	24	31	44	39.5	223	1.44	0
3067	1	53	52	23.6244474927603	0	0	0	26	33	57	42.8	312	1.25	0
3069	0	71	22	20.4294183624419	0	0	0	31	23	67	38.9	208	1.12	0
3070	0	76	52	23.3725761772853	0	1	0	34	21	69	42.3	420	1.29	0
3072	0	67	22	27.34375	0	1	0	43	51	64	40.3	179	1.58	0
3073	0	57	22	24.5089457652043	0	0	0	36	26	59	42.1	337	1.04	0
3075	1	62	22	22.4913494809689	0	1	0	6	20	74	43.4	325	1.36	0
3077	0	65	32	22.2222222222222	0	0	0	17	24	46	42.1	262	1.5	0
3079	1	65	72	23.5294117647059	0	0	0	36	32	86	45.5	387	1	0
3081	0	71	22	18.7304890738814	0	0	0	17	30	35	43.9	234	1.28	0
3082	0	92	72	16.4473684210526	0	1	0	20	31	51	42.9	278	1.24	0
3085	0	70	32	23.7332384003797	1	1	1	21	25	62	36.8	234	1.22	0
3086	1	72	32	20.0692041522491	0	0	0	93	50	81	38.9	314	0.96	0
3088	1	63	22	20.7612456747405	0	0	0	38	41	86	21	437	0.67	0
3091	0	59	32	21.359306249733	0	0	0	19	22	50	41.2	233	1.25	0
3093	0	62	32	23.7812128418549	0	0	0	24	40	54	38.3	274	1.11	0
3097	0	76	52	19.0249702734839	0	0	0	16	16	60	47.5	272	1.3	0
3100	1	54	32	20.7612456747405	0	0	0	44	20	55	42.9	370	1.09	0
3102	1	51	32	21.4691504822301	0	0	0	14	17	47	39.9	330	1.25	0
3103	1	58	32	25.9515570934256	0	0	0	14	15	44	36.8	168	1.11	0
3112	0	53	72	21.2305720237141	0	0	0	22	18	84	37.8	293	1.17	0
3113	0	57	52	23.051754907793	0	0	0	14	19	72	46.4	258	1.15	0
3121	0	53	32	22.5827091723437	0	0	0	19	24	39	33.3	187	0.98	0
3123	1	75	32	25.0761930481077	0	0	0	16	18	39	41.2	225	1.32	0
3126	1	62	72	23.3843537414966	1	1	0	31	24	64	43.8	346	1.22	0
3128	0	73	22	19.5629552549428	0	0	0	31	25	105	39.8	466	1.08	0
3130	1	55	72	23.8751147842057	1	1	1	17	24	62	38.4	228	1.18	0
3134	0	80	72	36.9822485207101	2	0	0	16	24	50	44.5	362	1.46	0
3135	0	55	22	22.4813290656912	0	0	0	50	26	70	40.5	242	1.04	0
3136	0	68	52	29.1748849441157	0	0	0	36	28	60	43.1	411	0.97	0
3139	0	66	22	18.0802103879027	0	0	0	15	25	69	36.8	198	1.6	0
3143	1	71	52	24.8015873015873	0	0	0	12	18	46	41.4	252	1.21	0
3148	0	72	32	25	0	0	0	17	18	54	40.7	246	1.24	0
3150	0	64	32	19.723865877712	0	0	0	20	19	56	42	213	1.13	0
3152	1	76	72	20.8890059844179	0	0	0	11	11	47	37.4	232	1.08	0
3154	0	71	32	22.3674400245603	0	1	0	22	22	48	40.5	253	1.43	0
3155	0	82	32	18.7304890738814	0	1	0	16	16	51	37.7	237	1.19	0
3156	0	70	52	27.34375	0	0	0	31	36	52	44.8	275	1.21	0
3157	0	60	32	24.65483234714	0	0	0	11	16	55	34.2	237	0.93	0
3160	0	61	32	22.6002629848784	0	0	0	46	34	59	40	330	1.29	0
3161	0	70	52	22.9591836734694	0	0	0	25	29	54	44.3	278	1.21	0
3166	0	76	22	25.8760580676286	0	0	0	15	18	61	37.6	492	1.16	0
3167	0	75	72	23.1385071035217	0	0	0	10	17	44	40.1	212	1.06	0
3177	1	62	32	27.7551020408163	0	0	0	74	57	58	36.1	178	0.9	0
3180	0	50	32	28.3038501560874	0	0	0	13	19	55	36.5	183	1.4	0
3181	1	81	32	22.6002629848784	0	0	0	23	22	75	46.3	335	1.3	0
3182	0	68	32	24.9739854318418	0	0	0	8	13	55	37.4	229	0.91	0
3183	0	62	22	20.8116545265349	0	0	0	51	24	61	36.7	276	1.24	0
3186	1	65	52	22.0580511886839	0	1	0	13	23	120	36.2	459	1.3	0
3187	0	68	32	24.9739854318418	0	0	0	37	32	66	36.7	304	0.9	0
3189	1	58	32	24.2214532871972	0	0	0	16	29	51	42.5	201	1.22	0
3191	0	67	52	28.3038501560874	0	1	0	15	19	189	37	402	0.89	0
3193	0	81	72	14.5681581685744	0	0	0	32	43	55	28.2	448	0.8	0
3203	0	54	22	28.6214703746422	0	0	0	31	33	60	33.8	249	1.3	0
3211	0	76	32	27.8876170655567	0	0	0	13	15	72	45	411	1.13	0
3212	1	71	22	21.2585034013605	0	0	0	10	17	57	44.5	103	1.04	0
3214	0	54	32	21.484375	0	0	0	16	24	86	41.4	420	0.99	0
3215	0	54	32	31.1950948402596	0	0	0	52	32	53	41.8	357	1.24	0
3218	1	76	32	22.8571428571429	0	0	0	12	15	46	35.6	178	1.01	0
3219	0	50	52	22.6002629848784	0	0	0	23	20	58	43.8	213	1.32	0
3223	1	68	32	22.3214285714286	0	0	0	15	16	59	40.1	219	1.14	0
3227	0	78	72	24.7736588441962	1	0	0	47	35	80	41.3	370	1.48	0
3228	1	87	32	20.2020202020202	0	0	0	45	25	68	41.1	330	1.02	0
3229	1	58	22	24.8409800895781	0	0	0	46	43	37	41.7	326	0.95	0
3230	0	62	32	17.7999288002848	0	0	0	17	19	64	39.4	245	1.25	0
3232	0	69	42	24.65483234714	0	1	0	21	26	42	45.8	270	1.29	0
3237	0	63	22	20.8888888888889	0	0	0	26	25	52	43.1	178	1.4	0
3238	0	82	72	17.578125	0	0	0	22	20	44	42.2	342	1.12	0
3245	1	72	72	23.3066800530675	2	1	0	21	18	86	34.3	347	0.75	0
3246	0	90	72	21.5800337774442	0	0	0	19	18	29	41.7	174	1.16	0
3247	0	71	42	24.4444444444444	0	0	0	27	22	51	41.5	364	1.26	0
3248	0	57	42	25.390625	0	0	0	21	19	71	44.8	331	1.48	0
3249	0	65	32	23.8751147842057	0	0	0	28	21	50	38.3	355	1.09	0
3252	0	83	22	22.2222222222222	0	0	0	31	35	76	39.6	401	1.51	0
3255	1	53	72	23.7118446309609	0	0	0	10	14	89	38.9	453	1.44	0
3261	0	65	52	23.4952368747063	0	1	0	10	17	59	42.4	221	1.05	0
3262	1	90	22	16.3265306122449	0	0	0	10	14	41	41.4	189	1.12	0
3263	0	78	32	29.1363163371488	0	0	0	13	17	68	37.5	140	1.18	0
3265	1	66	32	21.2244897959184	0	0	0	14	16	47	45.2	248	0.95	0
3273	1	67	22	18.3654729109275	0	0	0	11	17	116	34.1	515	0.76	0
3278	0	57	22	21.7784352399737	0	0	0	17	22	73	45.2	357	1.41	0
3279	0	90	72	21.3333333333333	0	0	0	43	19	41	42.5	160	1.29	0
3281	0	74	22	23.1111111111111	0	1	0	19	25	74	45	429	1.07	0
3284	0	50	52	22.8623685413809	0	0	0	10	19	127	34.7	436	0.9	0
3285	0	88	22	24.4444444444444	0	1	0	21	23	51	44	227	1.23	0
3290	1	78	72	20.7612456747405	0	0	0	14	20	79	37.8	333	0.86	0
3291	1	57	52	24.0569347455645	0	0	0	7	13	62	31.5	206	1.16	0
3296	0	82	22	22.2222222222222	0	1	0	10	14	73	37.3	352	1.01	0
3301	1	89	32	22.4323025156225	0	0	0	25	28	68	38.7	318	1.04	0
3303	1	78	72	26.3656030286641	0	0	0	26	33	57	42.4	234	1.79	0
3308	0	52	22	27.34375	0	0	0	9	12	67	45.8	138	1.13	0
3310	1	65	72	31.2174817898023	0	0	0	50	23	45	40.5	128	1.07	0
3311	0	58	32	20.7756232686981	0	0	0	9	24	47	39.2	178	1.28	0
3312	1	70	32	27.5482093663912	0	0	0	43	40	107	34.1	451	0.97	0
3313	0	58	32	31.25	0	0	0	16	24	62	41	165	1.01	0
3324	0	71	32	26.6666666666667	0	0	0	23	27	41	45.6	258	1.58	0
3327	0	72	32	26.6666666666667	0	0	0	15	15	76	38	352	1.01	0
3329	0	72	22	20.8116545265349	0	0	0	12	17	80	54	276	1.27	0
3330	0	50	22	22.0317256849864	0	0	0	21	35	70	36.1	365	1.28	0
3336	0	56	52	20.8116545265349	0	0	0	13	19	49	42.1	288	1.36	0
3338	0	62	32	19.53125	0	0	0	33	31	88	39.7	400	1.19	0
3341	0	65	52	27.34375	0	0	0	22	25	95	37	318	0.89	0
3344	1	90	72	16.6493236212279	0	0	0	15	23	62	36.1	226	1.51	0
3345	1	80	22	22.0385674931129	0	0	0	9	16	59	36.1	192	1.06	0
3347	0	65	52	20.0288415318058	0	0	0	27	38	85	35.1	240	1.09	0
3349	0	68	22	25.9106843468983	0	0	0	23	26	47	33.4	147	1.16	0
3352	0	85	72	22.8928199791883	0	1	0	16	16	64	38.8	318	1.31	0
3353	0	74	72	23.8054016620499	0	0	0	54	48	124	41.3	379	1.52	0
3355	1	62	72	29.1373715521904	0	0	0	46	17	48	37	197	1.24	0
3358	0	65	52	21.484375	0	0	0	30	38	59	43.8	375	1.17	0
3360	0	87	72	23.3055885850178	1	1	0	40	30	53	40.3	349	1.53	0
3365	0	67	32	23.8751147842057	0	0	0	11	11	57	33.7	234	0.92	0
3369	0	57	52	26.7094017094017	0	0	0	14	18	60	39.5	166	0.92	0
3373	0	70	32	26.6654655195712	0	0	0	21	18	62	32.9	359	1.11	0
3376	1	68	72	19.7210369679802	0	0	0	10	25	37	41.1	173	1.36	0
3378	0	71	72	25.0657462195924	0	0	0	16	21	57	43.2	412	1.28	0
3379	0	85	72	23.7399561723886	0	0	0	15	23	55	42	270	1.42	0
3380	0	84	22	22.8928199791883	0	0	0	18	23	48	43.8	276	1.49	0
3381	0	55	32	23.4375	0	0	0	12	22	91	33	322	1.05	0
3385	0	64	32	23.9188302920412	0	1	0	16	15	51	38.8	259	1.61	0
3387	1	64	72	22.4913494809689	0	0	0	21	29	72	36.5	209	1.27	0
3389	0	85	72	24.0344071512903	0	0	0	19	20	71	42.1	356	0.92	0
3392	0	66	32	24.1671624033313	0	0	0	12	16	65	38.4	340	1.16	0
3393	0	71	72	27.5555555555556	0	0	0	27	24	56	44.2	151	1.65	0
3394	0	90	72	25.390625	0	0	0	8	20	57	34.9	252	1.36	0
3395	1	55	22	25.7116620752984	0	0	0	15	19	72	39.2	318	1.16	0
3402	0	83	32	18.7304890738814	0	0	0	8	26	61	34.5	220	1.17	0
3403	0	59	32	22.8328793462586	0	0	0	26	23	58	41.3	288	1.05	0
3410	0	87	72	21.484375	0	0	0	11	16	95	37.1	203	1.07	0
3413	0	87	72	17.578125	2	1	0	21	18	54	41.5	259	0.93	0
3414	0	56	32	23.8751147842057	0	1	0	11	17	61	35.7	160	1.43	0
3416	0	67	32	24.5577523413111	0	0	0	32	31	52	35	216	0.64	0
3418	0	60	32	25.7116620752984	0	0	0	17	22	46	36.4	293	1.31	0
3419	0	83	72	27.5862068965517	0	0	0	11	23	83	37.2	261	1.13	0
3422	1	51	32	24.9770431588613	0	0	0	54	72	51	37.3	224	1.57	0
3423	0	67	32	18.5901249256395	0	0	0	16	28	61	41.7	239	1.22	0
3428	1	52	22	22.4913494809689	0	0	0	36	34	36	42.5	160	1.03	0
3433	0	58	22	25.0761930481077	0	0	0	14	14	97	44.6	300	1.33	0
3434	0	84	72	22.3543400713436	0	0	0	12	13	31	37.9	203	1.18	0
3436	0	72	72	22.8928199791883	3	0	0	13	23	55	37.4	214	1.49	0
3445	1	83	32	25.0995015956112	0	0	0	19	20	45	49.2	240	1.45	0
3456	1	86	42	20.7008167413151	0	0	0	9	16	59	36.3	210	0.94	0
3463	1	73	72	22.4940511600238	0	0	0	19	20	56	42.6	352	1.05	0
3465	1	50	52	20.7612456747405	0	0	0	9	17	50	36.8	226	0.97	0
3467	0	56	52	25.78125	0	0	0	21	18	92	44.3	351	1.11	0
3470	1	57	22	20.7612456747405	0	0	0	13	12	63	38.6	421	0.99	0
3475	0	66	72	22.8623685413809	0	0	0	26	40	73	44	338	1.33	0
3479	0	65	52	24.4646016033724	0	0	0	14	16	62	28.1	232	0.8	0
3482	1	67	72	18.5123966942149	2	0	0	22	47	84	40.2	391	0.92	0
3484	0	74	22	22.8623685413809	0	0	0	16	18	36	39.2	251	0.95	0
3486	0	68	72	18.1861881108797	1	0	0	35	33	73	43.1	287	1.18	0
3491	0	51	72	31.25	0	0	0	12	21	55	40.9	262	1.09	0
3493	0	67	52	25.390625	0	0	0	31	24	71	37.4	294	0.84	0
3495	1	95	72	23.3936869091492	0	1	0	19	13	69	36.1	200	1.26	0
3497	0	84	32	20.8116545265349	0	0	0	9	12	55	42.9	198	1.13	0
3498	1	53	32	24.9134948096886	0	0	0	10	17	41	37.5	154	1.46	0
3502	1	61	32	23.3066800530675	0	1	0	21	17	55	37.7	292	1.35	0
3504	1	68	32	24.6097337006428	2	0	0	18	26	74	41.4	292	0.85	0
3509	0	83	32	23.0680507497116	1	1	0	23	28	74	40.7	269	1.1	0
3510	0	72	72	24.3417582863402	2	0	0	10	22	196	34.4	494	1.04	0
3511	1	59	52	23.4375	0	0	0	17	21	56	39.9	345	1.33	0
3512	0	73	22	21.875	0	0	0	14	28	47	38.5	277	1.29	0
3513	0	74	52	26.6666666666667	0	0	0	15	23	74	37.9	347	1.47	0
3516	1	55	32	21.3039485766759	0	0	0	9	11	49	39.5	226	1.67	0
3523	0	65	22	27.0551508844953	0	0	0	30	53	63	35.5	300	1.38	0
3525	0	86	72	16.6468489892985	1	1	0	21	26	36	38.7	155	1.18	0
3527	1	59	72	22.4996371026274	0	0	0	13	27	62	36.4	328	1.72	0
3529	1	52	72	22.0385674931129	0	0	0	12	19	76	36.3	329	1.03	0
3530	0	60	52	22.8928199791883	1	1	1	15	18	66	39.3	361	1.03	0
3531	0	78	72	20.8116545265349	0	0	0	19	22	66	38.1	243	1.35	0
3536	0	71	72	23.4375	0	0	0	32	26	65	37.1	322	0.88	0
3540	0	88	72	19.9593554942662	0	0	0	23	31	93	45.4	283	1.3	0
3541	0	73	32	28.8888888888889	0	0	0	26	24	56	40.6	281	1.18	0
3544	1	63	52	21.484375	0	0	0	20	14	85	48.6	234	0.93	0
3546	0	76	72	25.3902185223725	1	1	1	18	23	84	40.1	407	1.86	0
3550	0	77	42	27.6360544217687	1	1	0	14	16	43	38.7	230	1.25	0
3555	0	70	32	19.53125	0	0	0	13	20	60	40.8	220	1.09	0
3558	1	75	32	24.2214532871972	2	1	1	15	26	51	38.3	323	1.69	0
3563	0	56	52	26.7094017094017	0	0	0	24	33	46	37.8	163	0.57	0
3565	0	51	42	24.9739854318418	0	0	0	18	17	75	39.9	248	1.26	0
3566	0	78	32	21.7554685336814	1	1	0	11	25	60	29.2	274	0.72	0
3568	1	68	52	27.1808999081726	0	1	0	28	23	46	39	274	1.14	0
3569	0	60	32	25.390625	0	0	0	7	19	32	34.7	221	0.97	0
3571	0	84	72	22.8129339416782	0	0	0	10	13	42	34.9	202	0.96	0
3575	1	59	72	15.5709342560554	0	0	0	13	27	60	36.2	321	1.17	0
3576	1	76	72	19.0311418685121	0	0	0	14	19	57	38.4	214	1.06	0
3578	0	56	32	19.921875	0	0	0	15	21	60	43.2	268	1.09	0
3582	1	67	32	29.0687961508904	0	0	0	7	13	62	34.6	256	1.14	0
3584	1	56	32	18.9370029036738	1	0	0	26	24	39	41.5	314	1.1	0
3589	1	73	72	19.7210369679802	0	0	0	19	16	47	40.4	257	1.34	0
3591	1	70	52	24.8015873015873	0	0	0	20	27	59	41	217	0.97	0
3592	0	87	72	26.0374939913475	0	1	0	16	27	55	36	224	1.05	0
3593	1	83	32	17.3010380622837	0	0	0	32	36	58	44.9	341	1.09	0
3598	0	66	32	19.3337299226651	0	0	0	14	19	78	37.3	377	1.23	0
3599	0	61	22	21.7784352399737	2	1	0	49	44	66	34	273	0.97	0
3600	0	82	72	20.8116545265349	0	1	0	53	41	40	41.9	183	1.17	0
3602	0	87	72	17.7777777777778	0	0	0	10	16	65	41.1	223	1.6	0
3603	0	71	32	27.34375	0	1	0	31	51	61	36.3	421	1.21	0
3604	1	70	32	17.9591836734694	1	1	0	34	22	43	44.8	232	1.11	0
3606	1	68	42	23.8751147842057	0	0	0	17	18	66	39.5	249	1.25	0
3607	1	81	72	21.484375	0	0	0	6	11	63	33.1	229	1.26	0
3611	1	77	22	17.3010380622837	2	0	0	11	12	73	20.9	243	0.83	0
3616	0	58	32	20.0288415318058	0	0	0	7	13	68	39	199	1	0
3622	1	84	22	21.4532871972318	1	1	0	21	21	64	30.2	273	0.76	0
3628	0	70	32	23.7399561723886	0	0	0	37	18	54	39.6	247	1.16	0
3632	1	64	32	24.0569347455645	0	0	0	10	15	47	41.4	351	1.31	0
3633	0	52	22	23.828125	0	0	0	17	22	130	38.9	408	1.28	0
3634	0	55	32	27.34375	0	0	0	25	21	64	40.3	407	1.21	0
3637	0	60	72	18.7304890738814	0	0	0	27	30	95	34.7	415	1.17	0
3639	0	72	22	24.9739854318418	0	0	0	9	11	52	41	137	1.13	0
3642	0	68	72	18.3654729109275	0	0	0	33	26	71	45.1	400	1.17	0
3647	0	51	42	25.4766600920447	0	0	0	12	18	59	39.9	233	1.27	0
3648	1	56	72	24.7675659198293	0	0	0	30	21	69	44.6	450	2.02	0
3653	0	56	32	21.3599145603418	0	0	0	30	35	77	46.5	330	1.51	0
3654	0	55	32	19.53125	0	0	0	24	15	70	41.9	185	1.44	0
3656	0	63	32	23.6340330075308	0	0	0	14	23	72	36.3	195	1.08	0
3667	1	55	52	22.65625	0	0	0	15	19	76	33.9	502	1.03	0
3670	1	57	42	23.6712536295922	0	0	0	26	22	45	36.9	310	0.96	0
3674	0	76	32	19.53125	0	0	0	22	22	40	42.9	325	1.41	0
3679	0	52	52	25.7116620752984	0	0	0	17	16	41	41.2	194	1.28	0
3680	0	67	52	21.2084487534626	1	1	1	13	13	61	48.2	482	1.04	0
3681	1	87	72	14.692378328742	0	0	0	26	33	62	46	385	1.71	0
3683	1	57	32	26.6666666666667	0	0	0	24	41	66	30.6	429	0.69	0
3684	0	53	32	28.8888888888889	0	0	0	38	27	74	43.1	370	1.02	0
3690	0	71	22	20.4081632653061	0	1	0	22	21	41	40.1	150	1.5	0
3692	0	70	32	22.2222222222222	0	0	0	29	33	62	41.8	209	1.21	0
3694	0	52	52	21.484375	0	0	0	12	17	82	42.5	467	1.07	0
3698	0	72	22	18.7304890738814	0	0	0	15	24	51	40.9	227	1.74	0
3700	1	73	72	19.53125	0	0	0	15	25	78	37.3	203	1.06	0
3704	0	67	22	22.2222222222222	0	1	0	14	19	49	40.7	244	1.14	0
3708	1	64	52	24.2214532871972	0	0	0	15	16	43	37.4	264	1.13	0
3709	0	55	32	22.0385674931129	0	0	0	18	21	107	39.9	256	1.12	0
3710	0	71	32	24.4444444444444	0	0	0	30	19	48	43.2	212	1.11	0
3714	1	55	72	20.5191340925413	0	0	0	6	12	44	35.7	266	1.02	0
3717	1	57	22	24.2214532871972	0	0	0	22	31	44	43	238	1.42	0
3722	0	64	22	24	0	0	0	17	28	60	42.6	270	1.34	0
3726	0	82	22	20.4294183624419	0	0	0	21	21	70	41.3	274	1.23	0
3727	0	62	52	27.8876170655567	0	0	0	19	19	59	42.3	197	1.33	0
3731	0	69	72	20.8116545265349	0	0	0	52	53	62	40.7	288	1.28	0
3732	0	54	32	19.8140527358634	0	0	0	23	23	68	40.2	555	1	0
3733	0	78	52	22.6757369614512	0	0	0	20	36	97	39.6	224	0.67	0
3735	0	70	22	20.8888888888889	0	0	0	29	33	61	44.8	288	1.26	0
3737	0	63	52	23.6340330075308	0	0	0	28	46	37	41.1	231	1.24	0
3738	0	65	72	29.7441998810232	0	1	0	25	34	59	35.3	260	0.98	0
3740	0	60	22	20.8888888888889	0	0	0	15	20	58	45	240	1.1	0
3741	0	78	72	22.5069252077562	1	1	0	13	24	81	40.3	376	0.9	0
3742	0	69	72	25.6311674996796	0	0	0	13	20	51	38.1	238	0.97	0
3743	0	55	32	26.0374939913475	0	0	0	8	18	74	37	199	1.06	0
3745	0	71	32	25.711008267078	0	0	0	28	27	74	42.9	324	1.44	0
3754	0	73	72	25.7232084155161	0	0	0	40	45	57	43.4	407	1.01	0
3759	0	80	32	20.8116545265349	0	0	0	16	19	116	45.3	283	1.16	0
3760	0	71	22	23.1111111111111	0	1	0	8	12	120	37.9	385	0.75	0
3761	0	78	22	20.5456936226167	0	1	0	14	26	60	34.6	191	1	0
3762	0	77	72	23.4375	0	1	0	11	11	82	46.6	279	1.13	0
3766	0	53	22	25.8477682188187	0	0	0	21	19	60	39.5	323	1.27	0
3772	0	55	32	23.4375	0	0	0	16	25	62	33.3	265	0.86	0
3773	1	84	72	24.3496091246956	1	1	0	8	20	76	42.2	460	1.21	0
3774	0	59	52	24.21875	0	0	0	28	21	55	41.5	311	1.32	0
3776	1	52	22	21.2244897959184	0	0	0	12	13	51	39.5	180	1.19	0
3777	0	70	52	22.31700059512	0	0	0	13	14	57	39.5	227	1.13	0
3779	1	77	72	20.5150864789799	0	0	0	60	82	49.9	37.2	219.2	0.93	0
3781	0	55	52	21.0007304601899	0	0	0	26	27	46	41.6	212	1.48	0
3788	0	78	22	21.484375	0	0	0	16	21	69	42	339	0.96	0
3790	0	70	72	18.3654729109275	1	0	0	15	17	92	43	417	1.09	0
3791	0	63	72	20.4444444444444	0	0	0	99	63	52	45.4	371	1.43	0
3792	1	61	32	25.390625	0	0	0	14	16	75	39.8	316	1.09	0
3793	0	65	22	24.0882231171666	0	0	0	20	27	98	42.4	299	1.22	0
3794	0	58	52	31.1111111111111	0	0	0	22	22	51	40.6	229	1.29	0
3795	0	71	72	23.4375	0	0	0	22	15	66	33.3	217	0.74	0
3801	1	65	22	21.2585034013605	0	0	0	11	12	59	43.5	205	1.36	0
3802	0	83	22	27.34375	0	0	0	37	32	69	52.5	269	1.27	0
3804	0	54	52	21.484375	0	0	0	23	34	44	41.8	114	1	0
3808	0	57	32	21.0828132906055	0	0	0	24	28	35	35.1	223	1.3	0
3809	1	94	72	19.0519737844841	0	0	0	23	24	70	44.6	243	1.36	0
3815	0	76	32	26.6666666666667	0	0	0	12	17	53	40.8	193	1.42	0
3817	0	69	72	23.9512265931195	0	0	0	10	18	57	42.2	203	1.28	0
3819	1	64	32	24.7409372871024	0	0	0	28	25	56	36.4	252	1.24	0
3820	1	54	42	21.7738423573813	0	0	0	5	14	70	39.6	207	1.05	0
3821	0	65	32	18.6666666666667	1	0	1	13	18	69	38.6	298	1.07	0
3822	0	68	32	22.4996371026274	0	0	0	15	21	52	38	307	1.76	0
3823	1	71	22	22.0385674931129	0	0	0	15	32	42	44.3	222	1.42	0
3824	0	84	72	26.6666666666667	0	1	0	17	12	62	41.5	304	0.91	0
3825	1	67	72	26.346494034401	1	0	1	9	16	60	41.1	299	1.13	0
3826	0	67	52	28.125	0	1	0	13	16	41	39	383	1.34	0
3827	1	72	32	21.9713358572201	0	0	0	15	26	76	40.7	282	1.11	0
3828	0	51	22	28.125	0	0	0	15	27	140	37.7	348	0.98	0
3829	1	83	72	17.9391227190309	1	0	0	14	19	57	40.2	204	1.41	0
3831	0	75	32	23.6294896030246	0	0	0	23	20	46	44.4	265	1.25	0
3832	0	70	22	22.4323025156225	0	0	0	14	11	46	41.3	271	1.14	0
3835	0	74	52	21.484375	0	0	0	9	16	100	39.6	459	0.96	0
3838	0	68	22	23.0111768573307	0	1	0	16	19	59	44.6	311	1.06	0
3839	1	87	72	26.8923231381548	1	0	0	13	12	43	42.3	219	1.42	0
3840	0	64	22	24.0344071512903	0	0	0	10	16	60	35.9	263	1.26	0
3841	0	69	32	29.2779604522319	0	0	0	17	23	60	41.4	391	1.46	0
3844	0	74	42	29.1363163371488	1	1	0	11	18	65	40.9	168	1.23	0
3846	0	68	22	27.6887781337764	0	0	0	84	54	57	46.2	349	1.39	0
3853	1	52	32	20.5498866213152	0	0	0	29	22	80	14.5	250	0.8	0
3854	0	62	22	30.4831580551745	0	0	0	11	16	69	39.8	241	1.12	0
3855	0	78	72	22.3214285714286	1	1	1	18	23	75	41.5	256	1	0
3856	0	81	32	19.2276878705336	1	1	0	14	19	62	38.2	138	0.98	0
3859	0	63	32	30.0432622977087	0	0	0	19	19	49	38.2	288	1.32	0
3860	1	79	32	19.1000918273646	0	0	0	32	23	81	40.8	359	1.37	0
3863	1	64	72	25.0761930481077	0	0	0	11	18	56	42.1	257	1.27	0
3865	1	89	32	21.2244897959184	0	0	0	16	25	107	20	443	1.08	0
3866	0	60	72	24.21875	0	0	0	15	16	53	39.5	189	1.74	0
3868	0	62	32	22.8328793462586	0	0	0	26	28	52	41.1	362	1.07	0
3869	0	76	32	23.4565584537437	0	0	0	31	35	92	40.8	454	1.2	0
3870	1	55	72	22.4913494809689	0	0	0	30	25	61	45.6	285	0.8	0
3872	0	67	32	25.5102040816327	0	0	0	60	32	67	41.9	437	1.06	0
3873	0	84	72	23.2334561768947	0	1	0	13	22	54	40.9	175	1.35	0
3875	0	92	72	22.2222222222222	1	0	0	20	25	68	41.9	262	1.09	0
3878	0	88	72	19.9791883454735	0	1	0	17	18	75	39.6	314	1.16	0
3887	0	65	52	21.9261258222297	0	0	0	7	19	90	44.1	352	1.23	0
3888	0	55	32	26.346494034401	0	0	0	14	21	55	41	271	1.47	0
3889	0	59	32	18.0259573786252	0	0	0	29	21	78	42.8	289	0.86	0
3892	0	73	32	18.3142559833507	0	0	0	11	20	46	38	324	0.86	0
3893	0	62	72	20.829995193078	0	0	0	9	22	75	38.8	521	1.27	0
3894	1	51	32	21.2585034013605	0	0	0	9	17	50	41.6	185	1.34	0
3895	0	86	72	22.7233379501385	0	0	0	19	19	47	37.7	193	1.44	0
3898	0	73	72	31.2174817898023	0	1	0	15	16	73	37.9	228	0.96	0
3899	0	56	52	27.5482093663912	0	0	0	16	19	88	43.5	437	1.18	0
3904	0	70	72	18.7304890738814	1	1	1	88	57	101	43.5	565	1.43	0
3909	0	77	32	21.2278876170656	0	0	0	18	31	70	43.6	318	1.14	0
3911	1	93	72	17.9930795847751	0	0	0	10	18	48	41	159	1.33	0
3912	0	89	72	20.8116545265349	0	0	0	20	28	44	38.6	220	1.23	0
3914	0	73	22	23.4952368747063	0	0	0	17	17	58	41.8	245	1.2	0
3918	0	54	52	20	0	0	0	14	17	38	42.2	151	1.85	0
3920	1	51	22	25.3515413737155	0	0	0	19	36	45	38.1	307	1.03	0
3921	0	60	32	23.2334561768947	0	0	0	19	14	77	42.3	289	0.95	0
3923	0	75	72	24.9739854318418	0	0	0	11	23	84	34.1	267	1.11	0
3925	1	51	22	17.6308539944904	0	0	0	18	24	64	38.8	251	1.49	0
3926	0	60	52	26.291723822588	0	0	0	40	31	75	41.5	341	1.49	0
3932	0	60	32	20.5693296602388	0	0	0	20	17	72	42	260	1.23	0
3934	0	58	32	24.4646016033724	0	0	0	16	23	76	38.6	308	1.28	0
3936	1	58	52	27.5482093663912	0	0	0	16	19	55	39.4	278	0.79	0
3937	1	50	32	31.9921713274869	0	0	0	18	33	76	32.8	396	1.01	0
3938	0	55	52	24.8777196829145	0	0	0	13	15	51	43.2	198	1.54	0
3941	1	84	72	20.7612456747405	0	0	0	42	38	60	45.5	373	1.7	0
3947	0	70	42	25.0657462195924	0	0	0	10	16	59	35.1	219	1.23	0
3948	1	71	72	23.0300453514739	0	0	0	13	18	61	37.9	359	1.25	0
3949	0	68	72	26.6666666666667	0	0	0	8	11	97	37.9	333	1.17	0
3951	0	91	72	16.8662506324844	0	0	0	20	18	58	42.4	312	1.22	0
3952	1	61	32	27.6360544217687	0	0	0	25	29	47	40.8	153	1.89	0
3953	0	57	22	24.21875	0	0	0	49	37	80	47.4	354	1.44	0
3958	0	82	32	24.7966673279111	0	0	0	28	28	109	37.3	466	1.35	0
3960	0	69	22	23.4375	1	0	0	27	35	75	34.4	356	1.15	0
3964	0	79	32	27.34375	0	0	0	11	23	69	41.5	191	1.12	0
3965	0	66	32	22.0317256849864	0	0	0	20	24	80	43.2	111	1.26	0
3966	0	62	22	26.7094017094017	0	0	0	18	27	71	42.1	535	1.33	0
3969	1	56	22	25.9515570934256	0	1	0	32	25	75	39.9	372	1.03	0
3970	0	52	52	23.4375	0	0	0	24	26	53	33.6	185	1.1	0
3972	1	85	72	24.3141239657425	1	1	0	17	23	45	42.4	212	1.16	0
3977	1	55	22	22.8373702422145	0	1	0	137	125	84	41.6	395	1.17	0
3982	0	68	32	20.2020202020202	0	0	0	13	9	42	35.6	263	1.11	0
3984	0	63	32	23.9360623149012	0	0	0	36	70	64	39.1	336	1.12	0
3988	0	83	72	20.9571711629325	0	0	0	35	17	57	45.2	295	1.22	0
3989	0	65	72	29.3847566574839	0	0	0	44	30	43	39.6	333	1.91	0
3991	0	66	52	23.1246703720232	0	0	0	36	44	63	40.2	531	1.09	0
3993	1	52	72	23.8751147842057	0	0	0	13	21	125	37.7	307	1.2	0
3995	0	59	52	27.120315581854	0	0	0	30	32	64	43.4	202	1.44	0
3996	0	57	32	25.7116620752984	0	0	0	14	21	60	36.7	230	1.32	0
3998	0	81	32	26.6666666666667	1	1	1	15	18	54	42.1	311	1.59	0
3999	0	68	72	25.5937370619895	2	0	1	11	18	72	43.7	295	1.4	0
4000	0	63	52	21.3333333333333	0	0	0	36	28	86	38.7	224	0.86	0
4002	0	57	72	18.3654729109275	0	0	0	17	23	73	42.9	212	1.14	0
4004	0	89	72	18.0259573786252	1	0	1	18	23	82	39	296	1.01	0
4006	0	54	52	26.6193433895297	0	0	0	15	26	108	38.9	454	1.09	0
4011	0	54	52	24.8409800895781	0	0	0	23	19	54	45.1	192	1.28	0
4013	0	53	42	23.828125	0	0	0	26	28	40	41	249	1.56	0
4027	1	68	32	22.4058769513315	0	0	0	19	24	66	35	225	1.06	0
4028	0	76	32	25.390625	0	0	0	7	14	49	34.6	294	0.85	0
4032	0	68	32	22.4323025156225	0	0	0	25	25	93	47.1	442	1.14	0
4033	1	62	72	22.0385674931129	0	0	0	17	21	53	45.1	224	1.66	0
4034	1	68	72	16.901027582477	1	0	1	14	31	52	41.7	203	1.12	0
4036	0	65	32	22.0385674931129	1	0	0	26	59	108	29.4	482	0.99	0
4037	1	62	32	27.5482093663912	0	0	0	17	15	47	41.8	219	1.17	0
4038	0	68	32	22.0385674931129	0	0	0	22	35	47	47.4	278	1.8	0
4044	1	94	72	19.4869614512472	0	0	0	28	34	57	31.6	278	1.02	0
4045	0	78	72	22.2222222222222	0	0	0	17	25	59	39.5	237	1.14	0
4046	0	55	52	27.2173029467267	0	0	0	9	16	50	28.5	219	0.94	0
4049	1	61	52	21.2585034013605	0	0	0	14	18	53	43.3	236	1.51	0
4050	1	83	22	22.77318640955	2	0	1	21	11	81	38.6	289	1.1	0
4052	0	55	42	21.875	0	0	0	20	23	46	40.6	144	1.21	0
4056	0	74	32	20.9321201247383	2	1	1	9	12	80	35.4	283	1.09	0
4059	0	79	72	29.296875	0	0	0	19	18	63	39	195	1.43	0
4060	0	71	72	20	0	0	0	22	26	64	37	427	1.16	0
4061	0	68	32	22.0317256849864	0	0	0	27	26	99	40.9	427	1.35	0
4064	0	79	22	25.5102040816327	0	0	0	13	20	49	42.3	183	1.33	0
4065	0	72	32	27.34375	0	0	0	20	34	56	46.7	316	1.36	0
4067	0	55	42	27.0051309748852	0	0	0	14	15	76	40.7	235	1.28	0
4069	1	60	52	25.390625	0	0	0	10	18	62	39.9	195	1.27	0
4071	1	56	72	22.4913494809689	0	0	0	21	28	65	41.5	366	1.31	0
4075	0	62	52	32.3939099449303	0	0	0	52	53	69	40.9	482	1.74	0
4076	1	67	32	23.6614386154678	0	0	0	29	37	91	42.5	386	1.31	0
4078	0	67	22	20.8888888888889	1	0	0	19	30	74	39.4	224	1.09	0
4080	1	62	32	25.7116620752984	0	0	0	14	20	73	37.5	319	1.35	0
4083	0	65	22	26.346494034401	0	0	0	20	30	89	39.7	436	1.15	0
4085	0	68	32	26.1426884803508	0	0	0	22	21	56	40.6	457	0.98	0
4086	0	87	52	19.53125	0	0	0	16	24	62	41.2	323	1.08	0
4087	0	55	52	24.4444444444444	0	0	0	19	38	54	39.6	260	1.02	0
4088	1	73	22	23.0111768573307	0	0	0	16	17	97	36.3	261	1.06	0
4089	1	66	72	23.4375	0	0	0	49	28	51	43.8	380	1.24	0
4095	1	54	22	21.484375	0	0	0	20	24	44	41.5	184	1.26	0
4097	0	83	72	26.1593341260404	0	1	0	22	24	86	34	368	0.77	0
4101	0	89	72	30.297783933518	0	1	0	18	17	69	37.5	275	1.01	0
4109	1	63	32	24.609375	0	0	0	18	26	71	43.6	396	1.44	0
4110	0	67	52	22.2222222222222	0	0	0	16	25	55	39	235	2.07	0
4111	1	82	32	17.96875	1	0	0	18	24	63	41	372	1.34	0
4112	0	84	72	21.4030915576694	0	1	0	24	30	50	45.9	288	1.38	0
4113	0	66	32	22.0385674931129	0	0	0	12	20	77	43.4	479	0.99	0
4114	0	74	72	23.7812128418549	0	0	0	19	18	60	46.2	300	1.61	0
4116	0	67	22	23.4375	0	0	0	18	23	80	38.3	293	1.29	0
4117	0	50	32	30.859375	0	0	0	14	18	43	39.1	183	1.29	0
4119	0	64	52	24.21875	0	0	0	12	15	74	38.3	220	0.93	0
4122	0	67	52	17.224803717353	0	0	0	13	17	95	41.4	311	1.15	0
4123	0	79	32	23.4375	0	0	0	18	33	74	42.7	239	1.58	0
4124	0	86	72	22.5069252077562	0	0	0	12	30	84	33.8	214	1.07	0
4125	1	70	22	19.140625	0	0	0	23	29	43	46.7	384	1.3	0
4132	1	71	32	25.7116620752984	0	0	0	8	12	69	42.9	207	1.01	0
4134	0	83	32	24.8357634994392	0	0	0	32	29	63	39	246	1.46	0
4135	0	70	72	20.7008167413151	1	0	0	7	11	32	38.3	108	1.46	0
4137	1	87	72	22.77318640955	0	1	0	53	47	60	37.7	385	1.13	0
4139	0	55	22	25.4766600920447	0	0	0	13	17	66	37.4	192	1.11	0
4142	1	73	72	21.2585034013605	0	0	0	11	20	74	39.6	171	0.97	0
4144	0	87	72	26.6666666666667	0	0	0	13	20	64	40	217	1.45	0
4145	0	52	52	23.4375	0	0	0	10	18	56	39	345	0.77	0
4146	0	89	22	17.3576671295378	0	0	0	8	14	147	34.3	412	0.8	0
4148	1	78	32	19.4869614512472	0	0	0	13	13	78	41.6	374	1.18	0
4151	0	77	22	28.8415318058004	0	0	0	20	20	43	44.2	260	1.77	0
4152	1	64	32	22.4913494809689	0	0	0	20	23	67	39.6	347	1.61	0
4153	1	51	52	25.390625	0	0	0	30	64	38	37.9	159	1.62	0
4156	1	54	72	21.5138585105239	0	0	0	32	25	66	44.2	420	1.37	0
4157	0	58	32	28.1969212010364	0	0	0	24	19	37	43.7	421	1.29	0
4158	0	84	42	17.7777777777778	0	0	0	25	23	58	41	394	1.23	0
4159	0	81	72	20.8116545265349	0	0	0	27	20	89	41.1	224	0.99	0
4163	0	65	32	22.5827091723437	0	0	0	20	20	77	39.2	194	1.33	0
4166	0	68	22	22.5465764803607	0	0	0	20	25	72	39.5	322	1.4	0
4167	0	71	22	23.4375	0	0	0	22	21	77	41	234	1.19	0
4170	1	71	32	31.0204081632653	0	0	0	12	25	57	40.3	365	1.2	0
4173	0	51	42	27.0551508844953	0	0	0	11	23	78	34.4	245	1.03	0
4176	1	52	52	22.8571428571429	0	0	0	49	31	48	38.2	252	0.8	0
4178	0	84	22	22.8299643281807	0	0	0	27	28	32	42.4	172	1.68	0
4180	0	70	52	18.7304890738814	0	0	0	14	23	62	41.1	300	1.73	0
4186	1	74	72	19.4869614512472	2	0	0	14	19	39	41	246	1.58	0
4189	0	58	32	22.5069252077562	0	0	0	28	25	77	32.6	320	1.13	0
4197	0	67	52	18.3391003460208	0	0	0	16	20	55	42.7	255	1.06	0
4199	0	69	32	23.4375	0	0	0	10	17	58	39.7	223	1.4	0
4203	0	87	72	19.53125	0	0	0	13	24	28	36.7	135	0.92	0
4208	1	85	72	26.5983015542381	0	0	0	19	23	59	43.6	314	1.08	0
4211	0	75	22	24.4444444444444	0	0	0	39	24	52	38.2	286	1	0
4214	0	63	52	24.9739854318418	0	0	0	33	23	67	47.2	281	1.09	0
4219	0	88	72	17.578125	2	1	1	10	20	101	37.2	242	1.21	0
4222	1	80	72	31.561671506123	0	0	0	46	36	54	41.3	342	1.14	0
4224	1	66	32	26.078971533517	0	0	0	12	20	84	42.9	290	1.3	0
4225	0	65	72	24.8357634994392	0	1	0	30	27	70	42.5	370	1.33	0
4226	1	83	72	25.8166302126286	1	1	0	19	25	58	37.2	307	1.16	0
4227	1	63	32	20.5693296602388	0	0	0	133	163	53	38	290	0.92	0
4228	1	67	72	24.9991246805084	1	0	0	28	17	81	47.1	306	1.13	0
4231	1	73	72	19.53125	0	0	0	6	20	41	38.5	191	1.17	0
4232	0	71	32	24.21875	0	0	0	26	43	65	43.2	336	1.02	0
4235	0	50	52	24.5577523413111	0	0	0	23	26	60	39.7	254	1.02	0
4236	0	87	32	22.4765868886576	0	0	0	19	30	232	42.2	438	0.98	0
4242	0	90	72	21.6441207075963	1	1	0	12	26	108	38.5	407	0.66	0
4247	0	93	72	20.4440763935614	0	0	0	13	18	45	41	314	1.26	0
4249	0	95	72	17.578125	0	0	0	15	23	64	37.7	273	1.23	0
4251	0	53	22	23.9360623149012	0	0	0	16	28	62	39.2	232	1.16	0
4252	0	81	72	18.7304890738814	1	0	1	12	19	74	35.4	356	1.06	0
4255	0	73	22	28.7639710716634	1	1	1	15	20	57	40.3	251	1.13	0
4257	0	79	32	24.9739854318418	0	0	0	11	12	58	47.9	179	1.27	0
4259	0	71	72	28.8888888888889	1	1	0	12	15	53	39.8	203	1.21	0
4260	1	86	72	16.5289256198347	0	0	0	84	44	57	44.4	328	1.17	0
4262	1	81	72	18.3654729109275	0	0	0	38	71	58	35.7	285	0.87	0
4265	0	63	52	27.2932241604367	0	0	0	29	33	44	38	181	1.51	0
4268	0	78	22	18.2615047479912	0	0	0	16	17	47	41.8	241	1.45	0
4269	0	88	32	16.015625	0	0	0	28	28	61	40.4	277	1.16	0
4270	0	68	72	22.2222222222222	1	1	0	9	18	47	33.2	342	1.15	0
4274	0	68	22	21.484375	0	0	0	9	18	86	31.5	272	1.06	0
4275	0	67	32	26.2222222222222	0	0	0	58	49	72	37	282	1.16	0
4276	1	65	22	21.0771952275208	0	0	0	9	15	55	39.7	224	1.1	0
4278	0	79	72	17.7777777777778	0	0	0	64	43	34	44.7	302	1.25	0
4280	0	63	32	29.296875	0	0	0	26	23	76	49.1	401	1.46	0
4282	0	63	52	26.0583536246743	0	0	0	31	24	100	37.9	280	1.71	0
4284	0	86	72	20.8116545265349	0	0	0	16	24	80	40.9	430	1.27	0
4288	1	63	22	21.6128117913832	0	0	0	32	46	52	32.8	180	1.26	0
4290	1	81	72	24.034609838167	0	0	0	11	25	78	47.6	334	1.22	0
4293	0	79	22	19.3129520052597	0	0	0	20	24	56	43.7	175	1.34	0
4294	0	79	22	21.6441207075963	1	1	1	8	14	63	39.7	287	1.16	0
4297	1	75	32	27.6360544217687	0	1	0	26	38	51	42.9	287	1.11	0
4300	0	66	32	25.9695290858726	0	0	0	16	23	58	38.2	284	1.26	0
4303	0	51	52	22.7189744005842	0	0	0	18	22	58	40.9	214	1.68	0
4305	0	52	22	24.034609838167	0	0	0	10	23	65	40.6	188	1.19	0
4313	0	91	72	21.359306249733	0	0	0	20	26	71	35.8	323	1.12	0
4316	0	66	72	16.6493236212279	0	0	0	24	11	44	42.9	194	1.15	0
4321	0	86	72	17.7777777777778	0	0	0	10	17	39	39	132	1.07	0
4324	0	86	22	23.8751147842057	0	0	0	21	28	71	43.6	426	0.95	0
4325	1	63	72	20.829995193078	0	0	0	21	22	80	40.7	244	1.19	0
4327	0	53	72	19.0519737844841	0	0	0	13	15	89	39.6	271	1.1	0
4333	0	74	32	20	0	0	0	10	12	60	36.6	215	0.84	0
4334	0	61	72	29.1363163371488	0	0	0	10	16	34	41.4	198	1.33	0
4336	0	70	22	19.8178444931692	0	0	0	26	33	80	35.5	247	1.11	0
4339	0	67	22	22.2222222222222	0	0	0	17	26	49	43.4	251	1.9	0
4343	1	67	72	19.7210369679802	0	0	0	12	22	49	35.7	229	1.18	0
4345	0	86	72	18.066167337875	0	0	0	54	51	72	43.9	313	1.5	0
4346	0	70	22	24.4444444444444	0	0	0	54	35	57	37.8	204	1.27	0
4349	0	87	72	24.4444444444444	0	0	0	19	26	56	35.1	327	1.23	0
4351	0	82	72	20	0	0	0	20	24	64	52.2	278	1.44	0
4352	1	57	32	25.2363403300753	0	0	0	19	20	70	41.8	205	1.47	0
4355	0	78	72	21.484375	0	1	0	6	13	89	35.7	332	0.87	0
4363	1	75	72	24.2214532871972	0	0	0	37	33	55	42.1	285	1.27	0
4365	0	63	32	19.8347107438017	0	0	0	27	31	73	40.3	474	1.25	0
4372	0	75	72	22.8928199791883	0	0	0	55	40	53	35.8	303	0.83	0
4374	0	80	72	18.491124260355	0	0	0	18	25	38	49.1	271	1.2	0
4376	1	56	32	19.3698347107438	0	0	0	40	64	50	41	356	1.05	0
4384	1	51	52	19.8140527358634	0	0	0	18	27	42	30.9	178	1.23	0
4388	1	52	32	23.8751147842057	0	0	0	24	27	64	44.2	236	1.51	0
4391	0	74	22	24.1415192507804	0	0	0	10	17	39	39.6	255	1.31	0
4393	0	70	72	27.5555555555556	0	0	0	18	19	45	39.2	239	1.4	0
4394	1	70	52	21.2585034013605	0	0	0	101	97	56	35.6	190	1.06	0
4397	0	62	52	27.0551508844953	0	0	0	12	21	98	34.3	362	1.06	0
4399	1	55	22	30.078125	0	0	0	10	17	176	35.7	579	1.34	0
4401	0	80	32	22.65625	0	0	0	15	18	77	45.9	315	1.29	0
4402	1	66	32	21.2244897959184	0	0	0	31	17	65	42.2	347	1.05	0
4403	0	57	32	24	0	0	0	21	25	65	38.3	184	1.34	0
4412	0	78	32	22.2222222222222	0	0	0	18	16	56	37.3	219	1.07	0
4413	0	79	72	18.0259573786252	0	0	0	16	15	66	36.4	272	1.08	0
4417	0	91	72	19.2276878705336	0	0	0	56	30	66	42.9	298	1.85	0
4420	0	51	52	23.2334561768947	0	0	0	12	18	56	38.3	287	1.1	0
4421	0	63	72	24.9739854318418	0	0	0	10	20	75	36.9	181	1.16	0
4423	0	80	72	20	0	0	0	28	26	45	42.8	212	1.33	0
4425	1	57	32	22.0385674931129	0	0	0	19	23	78	44.6	263	0.99	0
4426	0	55	52	26.4855397496689	0	0	0	12	9	59	32.8	251	1.2	0
4429	1	67	22	25.4028160836116	0	0	0	33	32	62	44.2	184	1.37	0
4437	1	57	52	21.484375	0	0	0	22	25	88	43	260	1.34	0
4439	0	66	22	30.1102788964583	0	0	0	33	30	36	42.8	193	1.95	0
4442	0	68	32	26.5625	2	1	0	9	15	53	37.4	269	1.14	0
4446	0	72	32	20.3125	0	0	0	17	22	86	43.7	313	1.17	0
4449	0	53	32	22.5895514360501	0	0	0	16	12	55	37.9	202	1.15	0
4452	0	74	42	25.5661066471877	0	0	0	45	46	63	33.6	297	1.05	0
4453	0	71	32	32.8125	0	1	0	22	29	74	39	325	0.91	0
4454	1	62	32	21.2585034013605	0	0	0	20	17	60	40.5	311	1.48	0
4455	0	67	32	23.4952368747063	0	0	0	57	43	46	34.6	185	1.24	0
4457	0	76	72	17.7777777777778	2	0	1	18	20	56	44.2	223	1.48	0
4458	0	58	32	20.7008167413151	0	0	0	25	40	49	42.2	154	1.19	0
4462	0	75	32	24.609375	1	1	1	46	44	57	38.4	349	0.8	0
4466	1	73	72	27.6094517551723	0	0	0	17	29	94	22.2	301	0.89	0
4468	1	75	72	20.7612456747405	0	0	0	16	15	74	45.8	260	1.27	0
4469	0	52	32	20.4294183624419	0	0	0	24	19	60	41.7	332	1.58	0
4474	1	66	22	27.0416441319632	0	0	0	17	20	68	42.4	327	1.05	0
4476	1	50	72	24.4351866688031	1	0	1	20	22	79	46.5	338	1.28	0
4480	0	77	72	20.8116545265349	0	0	0	37	33	62	40.7	187	1.18	0
4481	0	73	32	24.21875	0	0	0	17	19	81	41.5	367	1.01	0
4486	1	51	72	24.3141239657425	0	0	0	48	46	51	38.8	233	1.17	0
4488	0	66	22	22.265625	0	0	0	15	20	63	39.4	272	1.3	0
4492	0	81	72	22.6666666666667	2	1	0	32	21	55	37.8	183	1.48	0
4493	1	63	72	23.3886865581877	0	0	0	22	18	77	41.6	341	0.71	0
4496	0	65	32	23.7953599048186	0	0	0	23	34	64	31	199	0.93	0
4497	0	79	72	16.0230732254446	0	0	0	8	18	66	38.5	153	1.1	0
4500	0	75	72	25.390625	0	0	0	16	29	66	39	94	0.93	0
4503	0	77	22	19.53125	0	1	0	19	29	86	42.9	237	1.15	0
4507	0	66	32	22.8928199791883	0	0	0	21	28	79	42	236	1.03	0
4511	0	63	32	23.4375	0	0	0	23	30	74	36.8	393	1.21	0
4518	1	82	32	20.5456936226167	0	0	0	66	133	56	32.7	200	1.08	0
4523	0	77	32	29.3847566574839	0	0	0	12	23	88	36.8	285	1.21	0
4527	0	54	32	21.484375	0	0	0	14	18	65	34.5	222	0.9	0
4529	0	70	22	22.2222222222222	0	0	0	20	20	83	41.4	313	1.17	0
4530	0	60	72	23.4375	0	0	0	17	24	81	35.2	340	0.91	0
4533	1	88	72	20.0692041522491	0	0	0	29	25	55	42.1	203	1.44	0
4537	0	78	32	21.6412742382271	0	0	0	20	18	57	42.3	217	1.91	0
4540	0	83	72	20.3125	0	0	0	13	20	51	41.1	162	1.09	0
4549	0	80	22	24	0	0	0	13	20	43	43.3	160	1.44	0
4550	1	71	32	24.8357634994392	2	0	0	16	23	46	36.7	352	1.24	0
4552	1	80	72	25.7116620752984	0	0	0	11	14	161	38.9	434	1.34	0
4554	0	52	32	31.633714880333	0	0	0	11	15	77	39.9	314	1.16	0
4555	0	67	72	23.1111111111111	0	0	0	23	26	48	41.5	191	1.34	0
4557	0	64	32	22.65625	1	0	0	17	20	62	45.1	234	1.28	0
4559	1	79	72	23.7386621315193	0	0	0	15	21	67	41.9	211	1.16	0
4563	1	60	32	21.6712580348944	0	0	0	21	23	75	39.8	306	1.16	0
4564	0	73	22	22.0317256849864	0	0	0	19	25	43	38.7	220	1.85	0
4565	1	62	52	20.2020202020202	0	0	0	22	19	47	38.9	119	1.56	0
4568	0	50	32	22.5465764803607	0	0	0	20	15	63	32.6	328	1.11	0
4570	0	62	22	24.1287923737194	0	0	0	26	27	45	45.5	181	1.45	0
4571	0	64	72	19.140625	0	0	0	19	22	63	43.1	398	1.25	0
4574	0	75	32	27.8851873884593	0	0	0	22	18	61	37.7	181	1.22	0
4576	0	62	32	24.3865264441396	0	1	0	6	14	50	35.5	174	1.07	0
4577	0	51	32	23.051754907793	0	0	0	59	72	138	32.7	345	0.29	0
4578	0	76	32	24.21875	0	0	0	16	23	77	41.8	280	1.39	0
4579	0	64	22	23.4375	0	0	0	89	88	46	33.5	203	1.15	0
4584	0	53	52	20.8116545265349	0	0	0	14	25	73	41.8	242	1.22	0
4585	1	85	72	20.0692041522491	0	0	0	12	16	60	41.2	243	1.44	0
4591	0	79	72	23.422090729783	0	0	0	28	51	70	41.5	383	1.19	0
4592	0	67	32	22.8928199791883	0	0	0	9	16	55	37.6	184	1.17	0
4593	1	56	22	23.0300453514739	0	0	0	15	20	57	35.5	192	1.12	0
4595	0	77	72	20	0	0	0	11	14	52	39.2	247	1.45	0
4597	0	70	72	16.6493236212279	0	0	0	91	70	104	45.5	367	1.22	0
4598	0	64	52	19.1467221644121	0	0	0	7	14	56	34.1	145	0.96	0
4603	1	63	72	19.4869614512472	0	0	0	10	16	53	37.2	69	1.26	0
4607	1	76	22	28.90625	0	0	0	22	24	46	39.5	221	1.41	0
4611	0	62	32	25.390625	0	0	0	18	15	63	41	327	1.19	0
4617	1	73	22	17.7154195011338	0	0	0	37	26	66	39.1	148	1.27	0
4618	0	72	32	26.1593341260404	0	0	0	24	26	41	39.4	228	1.38	0
4621	0	63	22	28.5779606767261	0	0	0	13	13	58	41.9	241	1.71	0
4624	1	64	72	27.0416441319632	0	0	0	15	21	47	38.5	335	1.19	0
4625	0	87	72	22.5069252077562	0	0	0	17	24	47	44	303	1.63	0
4627	0	63	72	27.6646043961571	1	0	0	18	24	49	40.4	232	1.02	0
4629	0	55	32	25.78125	0	0	0	13	10	63	43.9	310	1.14	0
4637	0	57	52	20.3125	0	0	0	18	24	73	43.6	238	1.16	0
4639	0	62	72	28.6501377410468	1	1	0	16	25	32	38	100	1.26	0
4645	1	54	32	27.0841590698903	0	0	0	21	24	60	43.8	282	1.09	0
4649	0	65	22	24.9739854318418	0	0	0	35	32	58	36.7	244	0.93	0
4653	1	73	72	23.4375	0	0	0	44	54	52	42.7	314	1.11	0
4655	0	72	52	23.4375	0	0	0	11	26	45	42.2	268	1.69	0
4656	0	50	32	27.34375	0	0	0	41	26	69	36	235	0.98	0
4660	0	93	72	21.4030915576694	0	0	0	12	17	67	38.7	256	1.34	0
4661	0	78	22	23.4375	1	1	0	23	25	61	40.8	341	1.1	0
4662	1	58	22	23.5102040816327	0	0	0	7	16	53	37.1	166	1.11	0
4666	1	81	72	23.4375	0	0	0	69	40	57	36.8	278	1.23	0
4669	0	83	22	22.2222222222222	4	1	1	22	19	37	44.3	154	1.84	0
4670	0	50	32	18.75	0	0	0	25	21	52	39.7	238	1.53	0
4671	1	89	72	22.4913494809689	0	0	0	22	26	51	42.4	220	1.19	0
4673	1	66	52	26.2595847484332	0	0	0	25	22	49	40.8	206	1.41	0
4676	0	57	32	21.6441207075963	0	0	0	61	46	53	41.7	182	1.53	0
4682	0	74	22	24.9739854318418	0	1	0	14	21	51	31.8	105	0.77	0
4683	0	55	52	25.887573964497	0	1	0	12	18	56	42	200	1.44	0
4685	0	81	72	26.1068783632586	4	1	0	67	126	84	40	378	1	0
4686	0	78	32	21.484375	0	0	0	18	24	44	42	210	1.56	0
4689	0	64	32	21.3382106386222	0	0	0	12	19	42	37.8	244	1.1	0
4690	0	71	52	28.5374554102259	0	0	0	22	30	65	40.6	283	1.14	0
4694	1	71	72	24.4646016033724	0	0	0	34	32	50	34	298	1.37	0
4695	0	63	42	20.4444444444444	0	0	0	9	14	155	38.3	146	0.92	0
4697	0	77	72	19.53125	0	0	0	24	23	81	38.2	440	1.11	0
4705	1	64	32	28.125	0	0	0	23	23	81	39.2	260	0.94	0
4706	1	65	72	17.578125	0	0	0	5	11	49	33.5	254	1.1	0
4707	1	88	72	26.5731292517007	0	0	0	13	19	65	35.2	259	0.87	0
4709	1	75	52	26.9896193771626	0	0	0	13	21	42	38.6	224	1.36	0
4711	0	89	72	17.7777777777778	0	0	0	40	26	47	39.3	208	1.43	0
4714	1	55	52	23.8751147842057	0	0	0	21	24	66	41.2	226	0.97	0
4721	0	69	32	25.7777777777778	0	0	0	31	24	56	43.6	159	0.98	0
4725	0	56	52	28.7639710716634	0	1	0	17	21	58	42.1	236	1.23	0
4728	1	88	72	15.9438775510204	1	0	0	18	18	49	37.2	283	1.3	0
4730	0	57	52	19.53125	0	0	0	58	32	41	41.8	316	1.75	0
4731	0	67	52	23.4375	0	0	0	53	65	77	42.4	194	1.3	0
4732	0	53	52	23.4375	0	0	0	16	20	85	41.1	334	1	0
4735	1	56	52	20.7612456747405	0	0	0	11	19	44	42.9	236	1.3	0
4739	1	85	52	20.7008167413151	0	0	0	11	25	43	41.7	292	1.29	0
4743	0	58	72	24.4444444444444	0	0	0	22	20	49	40.1	187	1.4	0
4745	1	58	22	27.0416441319632	0	0	0	16	17	42	34.5	202	0.96	0
4748	0	59	32	23.7332384003797	0	1	0	41	35	59	48	247	1.18	0
4752	0	85	72	20	0	0	0	17	19	55	38.4	287	1.24	0
4753	1	64	32	25.7116620752984	0	0	0	14	18	35	39.1	194	1.31	0
4759	0	52	52	24.7675659198293	0	0	0	24	17	49	37.7	258	0.88	0
4760	0	57	32	21.484375	0	0	0	18	20	111	36.1	379	1.22	0
4763	0	56	52	19.1953027964922	0	0	0	11	18	98	33.6	308	1.04	0
4764	0	73	52	23.422090729783	0	0	0	18	23	68	32.7	371	1.23	0
4766	1	58	72	22.3863142771225	1	1	1	17	21	59	38.4	161	1.49	0
4767	1	86	72	22.1453287197232	1	0	0	22	20	43	39.2	280	1.12	0
4768	0	68	72	23.4375	1	1	0	34	37	41	34.3	124	1	0
4771	0	82	72	24.1415192507804	4	1	1	25	25	57	38.8	288	0.95	0
4774	0	67	32	27.34375	0	0	0	15	24	60	34.8	218	0.98	0
4780	0	54	42	25.390625	0	0	0	28	34	45	41.5	304	1.29	0
4781	1	61	72	19.7231833910035	1	0	0	13	20	53	38.5	238	1.07	0
4784	0	61	22	19.6505617497544	0	0	0	28	35	72	40.2	238	1.44	0
4785	0	80	72	18.9745319615449	1	0	0	13	21	58	34.9	182	1.69	0
4786	0	60	32	25.390625	1	1	1	32	33	68	40.7	443	1.1	0
4788	0	72	52	27.34375	0	0	0	15	19	59	36.7	300	1.03	0
4789	0	65	32	23.2334561768947	0	0	0	34	36	55	41.4	254	1.1	0
4790	0	64	32	21.6311488543503	0	0	0	21	28	66	36.9	333	1.41	0
4796	0	84	72	22.0317256849864	0	0	0	19	20	54	39.6	334	1.39	0
4797	1	62	32	21.875	0	0	0	12	15	58	43.1	241	1.12	0
4798	0	78	22	22.2222222222222	0	0	0	25	24	62	43.1	324	1.24	0
4801	0	66	52	19.3821446936434	0	0	0	33	19	83	39	502	0.88	0
4805	0	73	32	24.8357634994392	0	0	0	12	14	85	31.2	246	0.91	0
4806	0	70	52	28.2283864654296	0	0	0	11	17	108	41.7	441	1.05	0
4809	0	59	32	26.5625	0	0	0	13	15	77	40.3	267	0.89	0
4812	0	61	52	19.53125	0	0	0	10	17	61	40.4	124	1.31	0
4813	0	62	32	27.0551508844953	0	0	0	30	48	58	43.9	532	1.66	0
4816	0	75	72	22.0385674931129	1	0	1	27	22	56	29	188	0.74	0
4817	1	66	52	22.5895514360501	0	0	0	23	24	45	46.2	263	1.55	0
4819	0	63	72	31.25	0	0	0	20	26	67	41.8	174	1.17	0
4821	0	53	32	24.4444444444444	0	0	0	16	19	62	38	288	1.5	0
4825	0	79	72	26.8386476526198	1	1	1	23	57	59	36.2	247	1.05	0
4828	1	57	72	32.0461464508893	0	0	0	7	13	87	33.9	281	0.81	0
4829	1	58	52	25.5296448712087	0	0	0	16	19	49	40.3	274	1.25	0
4832	1	66	72	28.6851446806985	0	0	0	15	30	73	40.3	276	1.09	0
4836	0	74	72	22.2222222222222	0	0	0	11	14	36	39.3	156	1.02	0
4837	0	63	72	26.4380708219837	0	0	0	28	33	64	45.4	365	1.46	0
4838	1	50	52	26.7228725206067	0	0	0	13	16	43	44.8	273	1.48	0
4846	1	75	72	20.0617283950617	0	0	0	33	37	51	42.1	254	1.08	0
4847	0	76	32	20.8116545265349	0	0	0	22	22	49	38.4	131	1.25	0
4848	1	79	72	23.0300453514739	0	0	0	16	20	46	40.8	238	1.2	0
4849	1	74	22	23.6487789822923	0	0	0	18	25	81	41.6	360	1.22	0
4850	1	68	72	19.6051919956733	0	0	0	12	21	50	37.7	190	1.07	0
4851	1	83	22	22.8373702422145	0	0	0	33	31	75	39.9	554	1.17	0
4856	0	52	22	22.8928199791883	0	0	0	30	21	42	32.4	226	1	0
4857	0	51	32	20.703125	1	0	0	27	25	58	38.6	228	1.18	0
4858	0	73	22	24.21875	1	1	0	62	35	77	45.6	340	1.09	0
4859	1	50	32	25.8064516129032	0	0	0	7	9	58	38.6	293	0.89	0
4862	1	75	72	24.8015873015873	1	1	0	13	21	42	39.1	153	1.3	0
4868	0	72	72	30.6122448979592	0	0	0	15	17	56	39.1	266	1.78	0
4870	1	65	72	22.6473769605192	0	0	0	14	19	73	42.1	361	1.62	0
4871	0	70	22	22.2222222222222	0	0	0	17	22	78	31.2	281	1.08	0
4872	1	54	32	18.5185185185185	0	0	0	23	19	52	44.1	243	1.17	0
4873	0	69	32	33.3333333333333	0	0	0	15	16	67	42.2	300	0.93	0
4876	0	80	32	22.8928199791883	0	1	0	14	18	79	44.3	356	1.02	0
4877	0	64	22	27.734375	0	0	0	27	27	78	39	347	1.06	0
4878	1	68	52	24.2214532871972	0	0	0	22	22	75	36.8	282	0.93	0
4886	0	71	22	30.0432622977087	2	1	0	18	15	62	38.4	301	1.18	0
4889	0	78	22	32.8731097961867	0	1	0	11	12	91	40.4	301	1.04	0
4890	0	53	52	19.723865877712	0	0	0	19	22	63	37.5	307	1	0
4891	0	69	22	24.034609838167	1	1	1	18	21	43	40.4	220	1.36	0
4894	1	86	72	24.9739854318418	7	0	0	16	19	61	41	175	1.08	0
4896	0	59	32	23.828125	0	0	0	21	27	45	34.1	347	1.26	0
4897	1	61	52	25.7116620752984	0	0	0	23	23	65	37	216	0.99	0
4898	0	67	32	20.5688066136624	0	0	0	22	29	77	38.6	272	1.39	0
4899	1	77	72	22.4913494809689	0	0	0	12	21	38	38.8	159	1.56	0
4901	1	76	32	27.34375	0	0	0	18	20	54	40.8	272	1.38	0
4904	1	78	22	19.5629552549428	2	1	0	22	24	72	41.7	298	1.16	0
4907	0	72	72	26.7697798929209	0	1	0	18	30	77	38.9	434	1.11	0
4909	0	85	32	18.7304890738814	0	1	0	12	23	44	38	143	1.05	0
4911	1	57	32	23.6614386154678	0	0	0	111	51	40	37.7	344	1.34	0
4912	1	62	32	24.4897959183673	0	0	0	43	26	65	40.9	309	1.32	0
4913	0	69	32	20.9571711629325	0	0	0	14	30	68	36.6	315	0.99	0
4915	1	82	32	24.8015873015873	1	0	0	11	15	53	35.5	302	1.17	0
4918	1	56	52	20.7008167413151	0	0	0	37	32	32	38.3	163	1.22	0
4919	0	51	52	23.4952368747063	0	0	0	94	76	42	40.2	236	1.18	0
4920	0	55	52	26.0374939913475	0	0	0	34	20	46	39.8	245	1.09	0
4922	0	91	72	22.2222222222222	0	1	0	24	14	55	36.8	330	1.01	0
4923	0	62	32	20.0288415318058	0	0	0	14	28	59	38.4	165	1.42	0
4924	1	67	72	20.7612456747405	0	0	0	25	33	79	35.6	255	1.26	0
4925	1	94	32	20.8116545265349	1	0	0	12	19	72	40.7	237	1.26	0
4927	0	88	72	23.4375	0	1	0	9	16	44	39.4	196	1.46	0
4929	0	62	42	24.5389649018441	1	0	1	28	23	45	43.1	246	1.37	0
4934	1	79	72	21.9713358572201	0	0	0	19	36	74	43.4	422	1.38	0
4935	0	63	32	22.8928199791883	2	0	1	17	21	54	41.3	294	0.94	0
4940	0	52	22	27.34375	0	0	0	7	14	58	31.9	343	1.13	0
4942	0	53	32	25.390625	0	0	0	11	20	63	39.9	215	1.8	0
4943	0	73	52	20.956607495069	0	1	0	44	40	62	42.3	495	1.96	0
4947	1	53	72	21.2585034013605	0	0	0	13	32	48	39.2	196	1	0
4948	0	51	32	22.8928199791883	0	0	0	25	22	58	41	254	1.2	0
4950	1	90	32	20.2020202020202	0	0	0	24	28	94	41.4	352	1.16	0
4955	0	58	32	22.8623685413809	0	0	0	19	39	71	33	357	0.83	0
4956	0	64	22	24.1671624033313	0	0	0	41	33	70	43.2	311	1.13	0
4960	1	72	22	19.5918367346939	0	0	0	12	21	67	44.8	508	1.38	0
4961	0	65	32	26.7094017094017	0	0	0	24	40	61	38	232	1.06	0
4966	1	87	72	21.2244897959184	1	1	0	15	20	115	37.1	539	1.17	0
4967	0	68	32	26.5731292517007	0	0	0	12	18	64	40.6	176	1.18	0
4969	0	69	32	25.5661066471877	0	0	0	21	22	44	39.9	172	1.38	0
4970	1	78	72	26.1224489795918	1	0	0	13	15	811	41.6	435	0.8	0
4973	0	52	42	19.1000918273646	0	0	0	19	19	62	43.8	292	1.26	0
4975	0	64	32	22.8928199791883	1	1	1	10	14	48	37.9	260	1.13	0
4977	1	67	32	20.4152249134948	0	0	0	29	33	69	42.3	236	1.31	0
4978	1	76	42	23.8751147842057	1	0	1	12	13	70	41.6	216	1.25	0
4979	0	59	72	14.0201890722641	0	0	0	12	12	55	46	237	1.36	0
4980	0	67	32	22.2222222222222	0	0	0	26	23	51	40.9	247	1.54	0
4981	0	65	32	26.171875	0	0	0	13	17	54	38.6	275	1.5	0
4985	1	55	32	23.5102040816327	0	0	0	8	12	53	34.8	226	0.99	0
4987	0	74	22	24.034609838167	0	0	0	13	12	38	37.6	193	1.32	0
4991	0	77	32	18.7304890738814	0	0	0	15	21	73	40	307	1.26	0
4993	1	84	72	17.3010380622837	1	1	0	17	25	56	37.7	128	1.19	0
4995	0	85	72	16.6493236212279	0	0	0	16	24	49	29	404	1.07	0
5001	0	79	22	26.6666666666667	0	0	0	16	17	61	37.1	287	1.46	0
5004	0	85	72	22.2222222222222	2	0	1	58	37	64	41.6	357	1.41	0
5005	0	77	22	22.826880934989	0	0	0	38	37	63	43.3	188	1.35	0
5009	0	72	72	25.2173585757838	0	0	0	28	16	74	44.3	366	1.22	0
5010	0	69	72	18.7304890738814	0	0	0	14	19	66	40.7	340	1.2	0
5011	0	60	32	20.8116545265349	0	1	0	19	21	50	43.8	259	1.05	0
5012	0	80	42	22.2222222222222	0	0	0	14	14	60	39.2	262	1.08	0
5015	1	82	72	22.5827091723437	0	0	0	17	15	81	37.9	335	1.24	0
5018	1	70	72	20.9366391184573	0	0	0	38	39	46	40.1	202	1.37	0
5019	1	62	32	21.484375	0	0	0	26	21	58	41.6	205	1.34	0
5027	1	50	32	21.5138585105239	1	0	0	10	16	70	39.3	152	1.52	0
5028	0	62	72	22.265625	0	0	0	9	12	47	36.7	155	0.96	0
5029	1	83	72	20.9366391184573	0	1	0	24	47	78	38.8	309	1.07	0
5030	0	55	72	24.034609838167	0	0	0	41	32	56	36.2	287	1.58	0
5031	0	57	52	22.8623685413809	0	0	0	54	65	64	37.2	280	1.02	0
5032	0	59	72	26.1426884803508	0	0	0	7	16	64	47.5	240	1.27	0
5035	0	87	72	20.8116545265349	0	1	0	17	15	106	39.9	362	0.86	0
5036	0	59	32	19.8347107438017	0	0	0	11	15	40	39	152	1.44	0
5043	1	64	72	22.8571428571429	0	0	0	24	39	29	33.5	357	0.96	0
5049	0	76	72	23.4375	0	1	0	25	46	55	34.7	207	1.23	0
5054	1	69	32	20.0692041522491	0	0	0	12	18	44	41.2	218	1.26	0
5055	1	61	32	21.4532871972318	0	0	0	29	23	65	44.6	435	1.01	0
5056	1	55	72	23.6614386154678	0	0	0	35	68	68	34.8	386	1.33	0
5063	0	80	32	19.53125	0	1	0	10	14	84	39.1	257	0.91	0
5066	0	59	32	26.0374939913475	0	1	0	28	20	78	46.3	429	1	0
5067	1	70	42	20.7612456747405	0	0	0	27	16	58	45.2	273	1.22	0
5072	0	79	22	18.491124260355	0	0	0	5	16	103	37.3	426	0.98	0
5073	0	69	32	21.1109026083693	0	0	0	31	18	55	38.2	103	1.07	0
5082	0	82	72	18.6666666666667	0	1	0	22	20	66	39.4	298	1.09	0
5084	1	69	32	25.9515570934256	0	0	0	18	28	58	39.2	318	1.07	0
5092	0	68	32	20.0288415318058	0	0	0	43	35	86	34.8	319	1.12	0
5093	0	77	42	22.2222222222222	0	0	0	23	23	49	42.4	280	1.46	0
5095	0	88	72	21.9713358572201	0	1	0	15	20	52	35.8	225	0.99	0
5100	0	81	32	23.1111111111111	0	0	0	24	25	73	46.6	376	1.18	0
5104	0	61	32	28.0403781445281	0	0	0	23	18	58	38.3	185	1.12	0
5105	0	59	42	24.9739854318418	0	0	0	33	23	55	44.5	341	0.93	0
5106	0	56	72	23.4375	0	0	0	22	22	65	42	409	1.21	0
5107	0	93	72	17.578125	0	1	0	56	50	43	43.2	161	1.23	0
5110	0	68	72	31.1111111111111	2	0	0	36	32	60	44.9	416	1.05	0
5111	1	87	72	17.0068027210884	0	0	0	25	21	69	49.6	333	1.25	0
5113	0	75	32	21.484375	0	0	0	17	17	55	41.5	336	1.39	0
5115	1	81	72	22.4913494809689	0	1	0	18	30	57	42.1	261	1.3	0
5119	0	64	32	24.65483234714	0	0	0	27	30	57	44.4	440	1.3	0
5123	1	59	52	25.9106843468983	0	0	0	12	20	44	40.1	349	1.39	0
5124	1	85	72	21.9671201814059	0	1	0	659	231	70	35.5	414	1.14	0
5127	1	83	72	21.7784352399737	0	1	0	12	13	57	40.8	175	0.8	0
5128	0	80	72	25.390625	0	0	0	15	13	96	48.2	319	1.26	0
5130	0	84	72	20.5456936226167	0	0	0	14	19	47	39.6	244	1.26	0
5133	0	58	32	22.265625	0	0	0	27	23	79	35.8	225	1.27	0
5135	1	60	72	18.359375	0	0	0	20	23	43	37.5	257	1.28	0
5136	0	91	72	20	0	1	0	18	17	39	38.5	119	1.02	0
5137	0	81	72	23.5555555555556	0	0	0	16	18	54	38.9	222	0.87	0
5145	1	75	22	25.9515570934256	0	0	0	16	17	42	36.1	396	1.11	0
5147	1	51	52	24.3046178773967	0	0	0	11	16	53	43.7	142	1.5	0
5150	0	63	72	20.8116545265349	0	0	0	56	32	53	42.4	262	0.99	0
5151	0	68	22	23.922422999701	0	0	0	19	20	37	34.8	358	2.08	0
5154	1	56	22	23.6712536295922	0	0	0	15	17	54	35.9	292	1.16	0
5160	0	53	32	19.53125	0	0	0	18	17	35	41.4	194	1.38	0
5170	0	78	72	25.8064516129032	0	0	0	16	17	45	44	225	1.59	0
5171	0	80	72	35.15625	0	1	0	11	20	62	40.4	224	1.48	0
5175	1	53	72	22.4913494809689	0	0	0	16	17	80	44.3	263	1.1	0
5179	0	75	72	21.3675213675214	0	0	0	17	26	99	43.1	348	0.99	0
5180	0	74	72	12.8503135827376	0	0	0	98	54	67	45.2	328	0.84	0
5182	0	64	22	20.8116545265349	1	0	0	16	33	119	37.6	504	0.92	0
5184	0	75	72	26.8386476526198	0	0	0	28	21	69	41.4	326	1.14	0
5186	0	72	32	20.2847985719502	0	0	0	17	16	529	25.1	997	0.56	0
5187	0	76	72	26.0583536246743	1	1	1	12	17	33	41.1	181	1.45	0
5189	0	85	32	19.53125	0	0	0	48	36	61	47	487	1.72	0
5191	0	51	72	20.7008167413151	0	0	0	14	37	50	39.3	245	1.2	0
5192	0	81	72	23.4375	0	0	0	12	19	66	43.9	241	1.23	0
5196	0	73	22	19.2233756247597	0	1	0	19	17	60	37.7	249	1.3	0
5197	0	51	32	22.2222222222222	0	0	0	21	23	80	39.8	399	1.39	0
5198	1	55	32	22.0385674931129	0	0	0	18	20	34	38.1	207	1.16	0
5202	0	79	22	22.8928199791883	1	0	0	37	38	43	43.7	267	1.35	0
5203	1	76	72	21.9671201814059	0	0	0	6	12	136	34.8	296	0.82	0
5207	0	77	72	20.9274673008323	1	0	0	9	19	131	37.9	550	1.17	0
5210	0	79	42	23.8519045923816	0	0	0	12	16	78	38.6	239	0.81	0
5212	0	67	72	25.390625	0	1	0	15	14	60	44.6	238	1.04	0
5215	0	75	72	28.0689443445463	0	0	0	14	27	63	34.6	233	1.35	0
5222	0	71	32	20.0288415318058	0	0	0	33	39	52	45.5	358	1.14	0
5223	0	81	22	26.346494034401	0	0	0	72	43	60	44.7	492	1.13	0
5225	0	71	22	15.625	0	0	0	19	21	34	38.1	164	1.35	0
5226	1	66	72	16.4560064423515	1	0	0	27	25	62	35.2	178	1.07	0
5228	0	85	72	25.9695290858726	0	0	0	22	16	50	40.7	279	1.29	0
5229	1	74	72	23.6614386154678	0	1	0	12	16	38	40.7	249	1.09	0
5230	1	88	72	20.8116545265349	0	0	0	10	17	184	31.1	423	0.98	0
5231	1	63	72	20.1955782312925	0	0	0	18	17	46	34.8	322	1.08	0
5234	0	64	32	31.1111111111111	0	0	0	17	15	66	45.2	251	1.04	0
5235	1	63	72	22.65625	2	0	0	25	28	63	39.7	218	1.9	0
5236	1	50	32	24.092970521542	0	0	0	15	19	65	37.4	178	1.15	0
5237	0	86	22	29.3333333333333	0	1	0	13	14	57	38.4	231	0.9	0
5248	1	85	72	24.2214532871972	0	0	0	25	42	70	38.4	178	0.88	0
5249	1	60	22	26.8923231381548	0	0	0	17	23	50	39.7	210	1.04	0
5250	0	74	32	24.9739854318418	0	0	0	17	17	55	42.4	366	1.27	0
5251	0	77	72	19.53125	1	0	1	15	14	83	38.3	181	1.01	0
5260	1	68	72	24.2214532871972	0	0	0	20	27	52	31.1	163	0.75	0
5261	0	69	22	25.390625	0	0	0	39	35	81	44.6	312	1.1	0
5267	0	80	22	18.5108056828173	0	0	0	21	29	47	47.1	277	1.42	0
5270	0	69	42	26.0374939913475	0	0	0	33	27	57	38.1	317	1.56	0
5271	0	67	32	26.7094017094017	1	1	1	17	19	47	39	231	1.21	0
5274	0	71	22	24.1415192507804	0	0	0	142	94	43	36.8	264	1.32	0
5275	0	64	22	26.171875	0	0	0	28	24	67	38.2	402	1.14	0
5276	1	80	32	27.0416441319632	0	0	0	18	28	59	42.1	294	1.51	0
5277	0	70	32	20.8116545265349	0	0	0	13	22	69	36.2	274	0.74	0
5279	0	55	32	25.887573964497	0	0	0	17	19	61	44.4	181	1.53	0
5280	0	69	22	20.8116545265349	0	0	0	16	22	138	38.7	283	1.55	0
5287	0	84	32	17.7777777777778	0	0	0	22	18	70	42.8	230	1.35	0
5288	0	59	32	25.0995015956112	0	0	0	9	14	41	36.1	147	1.25	0
5289	0	69	32	19.3129520052597	0	0	0	32	21	67	44.3	317	1.28	0
5290	1	58	72	19.0311418685121	0	0	0	43	27	64	42.5	382	0.79	0
5292	0	74	32	22.8928199791883	0	0	0	17	22	51	37.9	272	1.38	0
5294	0	67	32	22.265625	0	0	0	44	27	65	41.4	417	1.17	0
5297	1	84	72	23.3066800530675	0	0	0	40	43	63	36.2	420	0.84	0
5299	1	68	32	27.681660899654	0	0	0	28	30	55	41.1	323	1.61	0
5300	0	77	72	20.2020202020202	0	1	0	134	125	60	35	291	1.32	0
5301	0	85	72	24.4444444444444	1	1	0	23	24	51	39.3	240	1.02	0
5304	1	55	32	20.7612456747405	0	0	0	13	30	53	37.7	339	2.28	0
5306	0	58	72	22.0385674931129	1	0	0	34	21	91	45.2	331	0.99	0
5308	1	78	72	20.3954214360042	0	1	0	17	24	50	40.5	287	1.65	0
5310	1	81	22	23.8751147842057	0	0	0	21	28	74	38.7	304	1.16	0
5311	0	83	72	24.4444444444444	0	0	0	28	32	46	44.5	201	1.53	0
5312	1	66	32	20.7612456747405	0	0	0	13	22	75	41.1	246	1.31	0
5321	0	85	22	17.7777777777778	1	0	0	36	39	75	35.6	358	1.33	0
5327	1	75	22	26.5731292517007	0	0	0	18	24	113	24.9	462	0.97	0
5328	1	65	32	24.2214532871972	0	0	0	16	15	41	42.4	293	1.13	0
5329	0	56	22	22.8928199791883	0	0	0	18	29	48	39.2	235	1.03	0
5331	0	75	32	27.0551508844953	1	1	0	14	27	134	38.5	330	1.09	0
5333	0	77	42	31.1111111111111	0	0	0	14	18	60	37.9	309	1.03	0
5336	0	53	32	21.3333333333333	0	0	0	18	20	55	43.7	321	1.27	0
5340	0	67	72	24	0	0	0	21	22	43	41	258	1.18	0
5341	0	70	22	17.7777777777778	0	0	0	15	19	75	38.8	499	1.23	0
5346	1	88	72	19.7210369679802	0	0	0	17	30	60	36.7	359	1.08	0
5347	1	89	72	21.5138585105239	0	0	0	11	26	143	31.8	547	0.69	0
5348	0	57	32	24.1671624033313	0	0	0	20	37	72	30.9	319	0.89	0
5350	0	68	32	19.53125	0	0	0	26	27	49	39.9	253	1.14	0
5352	0	83	72	23.6304012345679	0	0	0	72	44	46	35.9	139	1.35	0
5353	1	67	52	25.5102040816327	0	0	0	20	73	46	41.7	99	1.11	0
5354	0	85	72	24.4646016033724	0	0	0	54	25	33	38.5	195	1.03	0
5356	0	75	72	20.8116545265349	4	0	0	20	17	85	39.9	308	0.98	0
5358	0	90	72	24.4444444444444	2	1	1	16	9	45	38.2	325	1.03	0
5359	0	79	22	23.7332384003797	0	0	0	11	18	49	38.8	251	1.18	0
5360	1	50	22	20.703125	0	0	0	23	18	65	37.1	218	1.28	0
5369	0	68	72	23.4375	0	0	0	25	24	62	40	290	1.25	0
5371	0	60	22	25.148605395519	0	0	0	13	16	40	39.9	218	1.05	0
5372	0	60	32	22.2309871275413	0	0	0	21	22	61	41.4	289	1.34	0
5374	0	65	42	26.6727632982777	0	0	0	17	25	50	39.8	201	1.11	0
5375	0	62	42	25.7116620752984	0	0	0	16	18	153	40	619	0.99	0
5376	0	72	32	29.1363163371488	0	0	0	17	20	78	45	246	1.17	0
5377	0	56	72	24.9739854318418	0	0	0	44	35	54	37.5	234	1.28	0
5380	0	70	32	26.8386476526198	0	0	0	12	18	44	42.3	279	1.7	0
5382	0	56	32	23.4375	0	0	0	29	20	64	39	303	0.88	0
5383	0	80	32	21.2278876170656	0	0	0	10	18	65	41.3	296	1.86	0
5385	0	60	22	28.0403781445281	0	0	0	27	18	52	43.8	286	1.49	0
5393	0	88	72	19.8991161090286	0	0	0	11	33	80	34	202	0.95	0
5395	0	74	22	23.2334561768947	0	0	0	17	32	49	44.3	285	1.83	0
5398	0	90	72	22.8299643281807	1	1	0	16	25	34	43.2	273	1.9	0
5400	0	76	72	20	1	0	0	22	20	42	40.9	94	1.62	0
5403	0	93	72	20.7756232686981	1	0	0	58	30	66	44.5	393	1.34	0
5405	0	53	42	28.2509698094114	0	0	0	17	15	78	36.9	443	1.2	0
5412	0	82	32	23.7252861602497	0	0	0	38	35	74	41.9	245	1.39	0
5413	0	68	32	25.390625	0	0	0	10	18	65	40.6	319	1.17	0
5415	1	76	72	19.5918367346939	0	0	0	14	20	39	43.6	256	1.06	0
5417	0	67	32	21.875	0	0	0	12	14	90	38.7	423	1.39	0
5419	0	75	72	18.3784919134636	0	0	0	15	16	82	37	262	1.02	0
5427	1	100	72	22.8928199791883	0	0	0	21	23	62	38.6	225	1.05	0
5429	0	55	72	23.4375	0	0	0	32	34	47	43.5	275	1.57	0
5432	0	51	32	20.7967298935064	0	0	0	11	10	66	41.9	396	1.15	0
5433	1	59	72	23.6614386154678	1	0	1	17	20	78	39.7	377	0.95	0
5435	0	58	52	21.484375	0	0	0	11	16	62	37.4	196	1.34	0
5436	0	72	42	22.8623685413809	0	0	0	15	24	43	39.5	254	1.34	0
5437	0	72	72	26.3702381435352	2	1	0	15	31	86	33.7	209	1.52	0
5444	0	66	32	22.190577904355	0	0	0	11	22	97	36.6	469	0.97	0
5447	0	61	72	24.8357634994392	0	1	0	17	15	47	36.3	263	0.8	0
5450	0	54	72	23.4375	0	0	0	20	18	37	47.1	332	1.25	0
5453	1	85	72	21.4532871972318	0	1	0	7	30	79	37.9	271	1.05	0
5456	1	72	72	23.6712536295922	1	0	0	10	16	88	35.2	271	1	0
5458	0	81	72	24.21875	0	0	0	51	50	72	40.5	421	1.69	0
5462	0	76	52	17.6253805479891	0	0	0	21	34	63	43.6	398	1.41	0
5463	0	79	42	40	0	0	0	30	21	64	39.1	266	1.12	0
5464	0	54	52	23.4375	0	0	0	15	21	47	42.5	210	1.25	0
5465	0	72	52	19.9593554942662	0	0	0	17	16	44	37	248	1.19	0
5468	0	91	72	16	0	1	0	11	17	53	36.4	176	0.86	0
5473	0	86	72	23.8751147842057	0	1	0	16	20	59	40.4	242	1.08	0
5474	1	84	72	14.692378328742	1	0	0	10	16	60	42.2	298	1.24	0
5476	0	67	52	31.8668252080856	0	0	0	17	17	52	43	294	1.52	0
5478	0	50	72	25.390625	0	0	0	17	29	64	41.8	257	1.32	0
5479	1	68	32	27.34375	0	0	0	42	32	61	41.8	260	1.15	0
5482	0	86	72	24.4444444444444	0	0	0	107	33	72	44.8	324	0.97	0
5483	1	58	32	22.5827091723437	0	0	0	14	16	54	41.6	120	1.49	0
5485	0	55	32	24.9107674003569	0	0	0	14	15	45	37.5	129	1.24	0
5486	1	56	52	24.8015873015873	0	0	0	17	22	38	35.9	221	1.03	0
5487	0	86	72	26.0374939913475	0	0	0	10	17	60	39	294	1.29	0
5488	1	81	72	21.192742415229	0	0	0	25	21	57	39	99	1.1	0
5492	0	64	32	29.5159386068477	0	0	0	32	19	62	46.5	252	1.24	0
5494	0	59	72	20.829995193078	0	1	0	35	26	55	44.4	335	1.08	0
5497	0	57	22	19.6282647011697	0	0	0	33	31	69	44	225	1.24	0
5499	0	64	52	21.09375	0	0	0	8	17	51	37.7	340	1.25	0
5501	1	51	52	24.092970521542	0	0	0	42	38	44	31.3	173	1.11	0
5503	0	85	72	20.8116545265349	0	0	0	34	46	44	36.8	264	1.02	0
5505	1	83	52	17.3010380622837	0	0	0	51	32	103	45.5	619	1.12	0
5506	0	77	32	23.922422999701	0	0	0	17	18	78	41.7	287	1.21	0
5508	0	68	42	24.9739854318418	0	0	0	22	28	49	38.4	416	1.27	0
5512	1	57	52	21.2585034013605	0	0	0	20	27	52	37.6	248	1.05	0
5513	0	81	72	22.2222222222222	0	1	0	18	16	47	43.6	347	1.64	0
5521	0	57	42	23.2334561768947	0	0	0	37	18	42	42.9	303	1.27	0
5523	0	69	52	23.422090729783	0	0	0	142	75	66	46.2	269	1.45	0
5524	0	78	72	27.2763340607022	2	1	1	19	20	60	42.1	271	1.22	0
5526	0	69	42	28.8415318058004	0	0	0	31	22	59	46.1	434	1.41	0
5528	0	68	52	27.34375	0	0	0	21	17	64	44.4	382	1.26	0
5531	0	67	32	23.309053069719	0	0	0	25	27	60	41.7	312	1.08	0
5532	0	56	52	17.908855357415	0	0	0	19	18	45	37.7	197	0.92	0
5535	0	58	52	23.4375	0	0	0	32	31	61	43.7	331	1.04	0
5538	0	68	22	29.1363163371488	0	0	0	28	16	67	38.8	118	1.32	0
5539	0	82	72	20.2847985719502	0	0	0	18	29	53	41.2	258	1.36	0
5540	1	56	72	23.5294117647059	0	0	0	17	27	45	40.7	182	1.27	0
5546	1	80	32	22.6002629848784	0	0	0	41	34	76	39.3	370	1.29	0
5551	0	75	52	23.4375	0	0	0	13	15	53	38.3	175	1.45	0
5554	0	54	52	21.484375	0	0	0	42	57	83	43	153	1.34	0
5561	0	65	22	24.21875	0	0	0	18	20	72	36.4	225	1.09	0
5562	0	91	32	18.7304890738814	0	0	0	14	22	102	35.3	209	1.16	0
5564	0	85	32	22.5069252077562	0	0	0	9	28	78	38.9	328	1.42	0
5568	0	72	22	26.6666666666667	0	1	0	18	19	52	40.1	320	1.25	0
5578	0	60	32	28.8888888888889	0	0	0	95	56	61	45.9	302	1.26	0
5580	0	77	72	21.7437737622282	0	0	0	27	32	66	41.5	287	1.28	0
5581	0	78	32	24.034609838167	3	0	0	24	20	56	39.7	281	0.94	0
5583	0	70	32	33.203125	0	0	0	33	23	63	43.7	300	1.23	0
5585	0	82	72	27.2392244832559	0	1	0	15	28	50	33.5	147	1.29	0
5586	1	60	72	23.6614386154678	0	0	0	9	16	66	34.6	279	1.24	0
5596	1	68	72	23.4375	1	0	0	25	60	75	40.1	416	0.94	0
5598	0	65	52	20.829995193078	0	0	0	40	32	80	40.8	238	1.14	0
5601	1	65	42	29.3757221385806	0	0	0	16	25	51	44.6	214	1.54	0
5602	0	67	32	29.1363163371488	0	0	0	41	43	53	46.2	314	1.02	0
5605	0	70	72	22.5069252077562	1	1	0	21	28	152	42.3	510	1.09	0
5606	1	83	32	25.4028160836116	0	0	0	15	17	59	36.3	226	1.33	0
5608	1	50	72	22.4081789853296	2	1	1	32	20	65	37.5	234	1.22	0
5609	0	66	22	25.390625	0	0	0	20	17	52	42.6	263	1.09	0
5612	0	58	42	21.0828132906055	0	0	0	12	17	94	40.3	298	1.13	0
5613	0	86	42	20.4444444444444	0	0	0	16	20	39	42.6	119	1.66	0
5617	0	57	52	30.46875	0	0	0	17	18	71	39	402	1.28	0
5618	0	68	22	24.6710526315789	0	0	0	15	19	43	39.2	196	0.87	0
5620	0	65	72	21.2585034013605	0	0	0	30	22	66	41.3	343	1.08	0
5624	0	87	22	17.7777777777778	0	0	0	14	16	49	40.1	201	1.36	0
5629	1	77	42	20.3125	0	0	0	39	40	38	39.4	137	1.46	0
5632	0	91	72	18.75	1	1	0	26	19	78	39.8	324	0.92	0
5634	1	67	22	25.4028160836116	0	0	0	14	22	64	33.6	261	0.99	0
5639	0	53	22	26.0374939913475	0	0	0	12	19	57	40.1	268	1.31	0
5642	0	74	32	22.3703433162893	0	0	0	16	20	60	37.7	179	1.22	0
5644	0	58	32	25.2173585757838	0	0	0	15	18	38	38.5	138	1.04	0
5650	1	56	52	26.0261748958953	0	0	0	20	20	61	45	273	1.37	0
5654	1	53	52	25.0593070266297	0	0	0	11	17	40	40.1	251	1.27	0
5655	0	61	32	20.5456936226167	0	0	0	15	18	68	41.1	299	1.32	0
5656	0	60	32	19.5716812826979	0	0	0	11	22	81	44.6	431	1.52	0
5659	0	73	42	22.8928199791883	0	1	0	13	22	79	34.4	325	1.16	0
5660	0	59	42	22.4765868886576	0	0	0	15	25	57	45.1	342	1.33	0
5661	0	66	52	20.7008167413151	0	0	0	15	21	32	45.5	133	1.54	0
5664	0	57	32	22.0385674931129	0	0	0	19	19	67	41.1	363	1.08	0
5666	0	65	72	22.6002629848784	0	0	0	20	32	142	37.3	380	1.08	0
5667	0	72	72	26.6193433895297	1	0	1	16	14	39	39.5	168	1.14	0
5668	0	70	22	17.578125	0	0	0	21	19	67	42.3	236	1.4	0
5669	1	89	72	24.092970521542	0	0	0	17	17	58	43.2	283	1.48	0
5670	1	79	32	20.7612456747405	0	0	0	21	32	41	37.7	189	1.02	0
5673	0	67	72	26.6727632982777	0	0	0	12	19	65	38.9	236	0.97	0
5674	1	89	52	19.1515847936417	0	0	0	13	16	38	31.2	206	1.57	0
5680	0	65	72	28.0403781445281	1	0	0	14	20	105	38.9	409	1.08	0
5685	0	72	22	27.34375	0	0	0	15	20	92	37.7	183	1.33	0
5686	0	65	52	22.4323025156225	0	0	0	29	31	78	44.6	315	0.92	0
5689	0	62	72	24.0344071512903	0	0	0	15	18	57	41.7	182	1.15	0
5691	0	55	32	30.4271978579253	0	0	0	27	30	96	35.2	501	1.18	0
5692	1	64	42	22.1367397300044	0	0	0	18	19	73	43.2	406	1.11	0
5693	0	54	52	27.34375	0	0	0	12	18	65	34	265	0.91	0
5694	0	66	42	25.390625	0	0	0	14	19	78	39.7	278	1.14	0
5695	0	51	32	19.140625	0	0	0	14	8	47	43.5	272	1.33	0
5701	0	72	32	29.1363163371488	0	0	0	27	29	53	45.1	286	1.61	0
5702	0	70	72	26.4855397496689	0	0	0	11	17	67	27.3	235	1.18	0
5706	1	61	52	23.4375	0	0	0	9	16	74	36.5	290	1.16	0
5707	1	90	72	19.53125	0	0	0	13	22	105	41.7	549	0.94	0
5710	0	58	72	24.21875	0	0	0	16	24	55	43.1	282	1.14	0
5712	1	58	52	19.53125	0	0	0	12	16	66	36.2	327	1.23	0
5714	0	76	22	25.887573964497	0	0	0	16	20	60	43.3	185	1.31	0
5717	1	53	52	26.6727632982777	1	0	1	16	16	92	40.3	326	1.17	0
5722	1	58	72	28.6851446806985	1	1	1	17	18	46	40.5	164	1.16	0
5723	1	64	32	27.281746031746	0	0	0	15	22	78	39.1	414	1.17	0
5730	0	78	72	24.6097337006428	0	0	0	28	36	52	42.5	313	1.14	0
5737	1	83	72	24.0882231171666	0	0	0	16	21	73	35.4	336	1.09	0
5740	0	64	32	16.8962350780533	0	0	0	21	17	81	41.1	273	1.06	0
5742	0	61	32	24.4472789115646	0	0	0	15	28	52	38	281	1.18	0
5743	0	59	52	23.0680507497116	0	0	0	35	32	59	49.6	316	1.53	0
5744	0	79	32	24.4444444444444	0	0	0	18	18	58	41.9	271	1.3	0
5746	0	58	52	22.0317256849864	0	0	0	90	53	40	44.4	235	1.05	0
5752	1	54	32	29.3847566574839	0	1	0	11	18	101	35.7	252	1.03	0
5757	1	66	32	24.2214532871972	0	0	0	15	21	43	44.5	206	1.13	0
5762	1	58	32	27.2173029467267	0	0	0	24	22	60	47.3	154	1.41	0
5766	0	58	72	20.8116545265349	0	0	0	19	20	54	42.4	134	1.32	0
5767	1	61	32	19.0519737844841	0	0	0	41	24	65	44.4	324	1.15	0
5771	1	57	72	26.2595847484332	0	0	0	26	25	77	42	264	1.11	0
5772	1	52	52	26.6727632982777	0	0	0	60	51	70	42.2	363	1.11	0
5773	1	81	72	17.6253805479891	0	0	0	18	19	56	40.3	277	1.48	0
5774	0	81	72	20.2020202020202	3	1	1	8	16	36	36.2	191	1.42	0
5775	1	61	32	26.0275824770146	0	1	0	31	26	56	45.2	257	1.34	0
5776	1	70	72	25.7116620752984	0	0	0	28	31	95	39.4	449	1.06	0
5779	0	66	42	22.4765868886576	0	0	0	24	22	86	41.1	286	1.22	0
5781	0	55	52	22.8328793462586	0	0	0	16	17	60	38.5	273	1.2	0
5785	0	52	72	20.3125	0	0	0	12	21	91	51.2	322	1.3	0
5786	0	53	42	21.7784352399737	0	0	0	33	58	61	40.1	211	1.04	0
5787	0	89	22	22.8928199791883	0	0	0	6	12	75	37.7	418	1.25	0
5788	0	72	32	22.2222222222222	0	0	0	11	18	54	37.2	160	1.76	0
5789	0	86	72	24.4646016033724	0	0	0	12	17	42	44.8	275	1.88	0
5790	0	54	52	20.956607495069	0	0	0	19	20	84	44.9	357	1.04	0
5796	1	50	72	23.5294117647059	0	0	0	12	19	77	44.8	317	1.55	0
5799	1	59	52	26.8135904499541	0	0	0	26	32	57	43.5	281	1.06	0
5800	0	69	72	20.7756232686981	0	0	0	59	45	51	35.3	241	1.57	0
5803	0	73	32	22.8928199791883	0	0	0	17	23	73	40.1	329	1.16	0
5810	1	59	32	22.0385674931129	0	0	0	42	18	66	45	245	1.25	0
5811	0	86	72	21.359306249733	0	0	0	32	29	58	40.5	251	1.3	0
5814	0	67	42	20.8116545265349	0	0	0	12	20	65	38	308	1.06	0
5816	1	51	42	23.4375	0	0	0	20	23	53	42.4	320	1.12	0
5818	0	63	42	25.9695290858726	0	0	0	11	18	37	38.3	233	1.01	0
5821	1	64	32	22.3214285714286	0	0	0	16	21	42	37	186	1.22	0
5826	0	72	32	18.6666666666667	0	0	0	21	22	49	43.5	241	1.47	0
5829	1	53	52	22.4913494809689	0	0	0	20	21	77	40.9	232	1.09	0
5831	0	56	32	21.484375	0	0	0	9	19	43	33.8	181	1.08	0
5832	1	51	72	24.8015873015873	0	0	0	23	26	78	38.8	375	1.25	0
5836	0	85	72	23.4375	0	0	0	20	21	71	42.6	210	1.33	0
5838	0	55	32	24.9739854318418	0	0	0	13	17	45	35.9	254	1.1	0
5845	1	50	52	22.7583067819754	0	0	0	16	16	72	40	211	1.5	0
5848	1	55	52	23.0300453514739	0	0	0	12	24	101	32.1	288	1.2	0
5849	1	67	22	23.0300453514739	0	0	0	30	23	83	41.7	440	0.98	0
5851	0	58	42	24.4646016033724	0	0	0	10	14	56	36.2	198	1.49	0
5852	1	51	32	20.1955782312925	0	0	0	21	21	53	49.3	228	1.43	0
5856	1	58	32	22.4913494809689	0	0	0	20	31	62	42.1	259	1.26	0
5857	0	65	22	23.8751147842057	0	0	0	21	28	61	42	186	1.11	0
5859	0	54	52	25.6369171607114	0	0	0	18	16	61	42	222	0.98	0
5861	0	57	52	25.7116620752984	0	0	0	17	20	79	45.8	269	1.33	0
5866	0	58	42	27.34375	0	0	0	22	19	54	39.5	268	1.24	0
5867	0	56	42	24.8015873015873	0	0	0	22	24	76	41.3	356	1.03	0
5879	1	50	22	23.0300453514739	0	0	0	17	24	35	41.3	146	1.16	0
5880	0	68	22	18.3654729109275	0	0	0	20	16	54	39.3	365	0.86	0
5881	0	50	42	24.4351866688031	0	0	0	16	35	79	37.8	304	1.02	0
5882	1	61	32	21.7180660897457	0	0	0	17	26	53	37.3	257	1.4	0
5883	0	72	32	23.8751147842057	1	0	0	11	18	77	26.7	259	0.75	0
5885	1	59	42	24.2214532871972	0	0	0	29	27	109	31.6	336	1.11	0
5887	0	61	22	31.25	0	0	0	11	10	56	35.9	251	1	0
5888	1	65	32	26.7299274950717	0	0	0	28	35	88	39.4	567	0.95	0
5893	0	53	42	19.140625	0	0	0	20	32	66	35.1	344	1.41	0
5896	0	68	42	24.8409800895781	0	0	0	24	21	61	38.3	322	1.06	0
5911	0	58	52	21.3333333333333	0	0	0	12	10	42	36.2	160	1.29	0
5912	0	52	22	22.8928199791883	0	0	0	22	26	73	46.2	517	1.71	0
5913	0	55	52	27.1105826397146	0	0	0	10	13	37	40	237	1.27	0
5914	0	64	22	19.0519737844841	0	1	0	15	23	91	39.2	419	0.95	0
5915	0	68	72	22.8928199791883	0	0	0	102	171	97	35.2	493	1.02	0
5917	1	58	52	19.8140527358634	0	0	0	13	19	65	41	300	1.16	0
5919	0	59	32	22.8928199791883	0	0	0	14	23	50	36.9	198	0.88	0
5921	0	61	52	24.5089457652043	0	0	0	15	16	34	44	205	1.65	0
5922	1	50	32	22.5827091723437	0	0	0	33	30	62	34.5	281	0.59	0
5923	0	61	52	19.2276878705336	0	0	0	17	33	57	43.4	384	1.77	0
5929	0	88	72	23.3725761772853	0	1	0	45	30	57	42.8	303	1.24	0
5930	1	96	22	23.8751147842057	6	0	0	38	28	55	40.5	261	1.45	0
5932	0	63	22	26.3702381435352	0	0	0	15	17	26	35.4	267	1.19	0
5935	1	64	72	22.4712087637714	0	0	0	20	21	43	48.1	166	1.43	0
5936	0	68	72	14.5681581685744	0	0	0	24	26	83	42.6	488	1.21	0
5938	1	75	72	25.0995015956112	2	1	0	33	43	67	46.5	261	1.61	0
5940	0	65	32	19.1467221644121	0	0	0	25	22	42	44.2	258	1	0
5942	0	71	72	19.3129520052597	0	0	0	18	20	57	44.7	254	1.39	0
5944	0	70	52	27.34375	0	0	0	13	17	64	35.9	255	1.25	0
5949	1	60	42	17.3010380622837	0	0	0	14	20	62	43.4	229	1.7	0
5950	1	65	32	25.9515570934256	0	0	0	18	25	51	43.2	220	1.23	0
5952	0	76	32	23.5303663434622	0	0	0	30	43	176	50.3	780	1.38	0
5953	0	50	42	23.7386621315193	0	0	0	11	18	114	32.1	411	0.68	0
5955	1	65	32	22.1453287197232	0	0	0	33	37	66	32.6	333	0.96	0
5956	0	53	22	23.2434080170706	0	0	0	20	32	61	40.6	180	0.72	0
5957	0	70	52	21.3382106386222	0	0	0	9	14	56	32.6	243	0.61	0
5960	0	53	42	24.9739854318418	0	0	0	20	21	66	41.1	251	1.25	0
5961	0	52	52	24.609375	0	0	0	26	24	71	39.5	314	1.31	0
5964	0	58	22	24.034609838167	0	0	0	22	18	68	41.3	217	0.87	0
5965	0	59	52	25.78125	0	0	0	44	27	73	39.9	324	1.24	0
5966	0	52	32	25.390625	0	0	0	41	38	82	40.5	404	0.98	0
5973	0	50	32	26.8923231381548	0	0	0	24	25	62	41.2	184	1.32	0
5974	0	50	52	26.0261748958953	0	0	0	43	29	51	45.6	456	1.04	0
5975	1	51	22	25.8645124716553	0	0	0	11	15	63	32.7	125	1.2	0
5976	1	53	42	20.7612456747405	0	0	0	11	23	123	40.1	343	0.88	0
5980	1	56	52	25.390625	0	0	0	11	23	46	36.5	230	1.34	0
5982	0	57	72	20.5498866213152	1	0	0	13	17	42	39.9	305	1.41	0
5985	0	58	42	24.034609838167	1	0	1	15	19	50	39.3	129	1.53	0
5986	0	59	52	22.6002629848784	0	0	0	20	22	53	44.4	238	1.62	0
5987	1	59	32	22.4913494809689	0	0	0	16	20	37	44.9	185	1.39	0
5990	1	64	42	21.295294753921	0	0	0	42	22	103	44.5	303	0.96	0
5992	0	90	72	17.7777777777778	0	0	0	10	13	66	30.5	217	0.92	0
5994	0	54	52	25.390625	0	0	0	17	27	56	39.7	261	1.12	0
5998	0	56	52	24.4646016033724	0	0	0	21	33	91	31.3	340	0.93	0
6001	0	74	22	27.5510204081633	0	0	0	19	22	65	39.5	388	1.12	0
6003	1	51	32	28.5779606767261	0	0	0	18	15	41	43	162	1.29	0
6004	1	66	52	22.4913494809689	0	0	0	16	29	59	40.6	231	1.06	0
6005	1	68	72	21.1552942020151	0	0	0	11	24	62	42.3	249	1.5	0
6006	0	62	52	24.9739854318418	0	0	0	14	19	53	42.8	266	1.2	0
6010	0	55	22	26.6666666666667	0	0	0	11	13	92	33.8	335	1.08	0
6011	0	55	32	23.4375	0	0	0	7	19	146	29.5	373	1.38	0
6012	0	66	22	20.8116545265349	0	0	0	46	28	61	35.7	403	1.5	0
6013	0	50	22	27.34375	0	0	0	14	22	69	35.4	262	1.14	0
6015	0	56	72	23.4375	0	0	0	48	99	67	37.9	285	0.91	0
6016	0	68	32	20.9366391184573	0	0	0	20	23	96	43.4	404	1.44	0
6023	0	76	22	22.3132784291452	2	0	1	19	22	59	42.7	189	1.07	0
6028	0	64	32	22.2222222222222	0	0	0	20	18	47	40.6	202	1.51	0
6029	0	57	72	18.3654729109275	0	0	0	13	17	100	29.6	277	0.75	0
6030	0	61	42	23.4375	0	0	0	22	19	66	42.4	283	1.05	0
6035	0	53	32	24.9739854318418	1	0	0	16	22	47	41.1	89	1.62	0
6036	0	54	52	29.296875	0	0	0	8	16	55	36.7	200	1.03	0
6037	0	51	32	25.390625	0	0	0	9	16	62	41	138	1.03	0
6040	0	60	32	24.2214532871972	0	0	0	28	20	72	40.4	330	1.09	0
6042	1	69	22	22.77318640955	0	0	0	12	19	54	31.5	248	0.97	0
6043	0	52	52	20.8116545265349	0	0	0	31	43	69	25.3	247	0.93	0
6045	0	73	72	20.5693296602388	1	0	0	22	16	71	44.4	400	0.95	0
6046	0	60	72	17.224803717353	0	0	0	48	26	77	43.5	394	1.72	0
6047	1	55	32	23.8751147842057	0	0	0	17	27	168	35.5	422	1.19	0
6049	0	59	32	21.484375	0	0	0	18	24	104	43.8	286	1.16	0
6050	0	60	52	21.2305720237141	0	0	0	27	33	45	44.8	257	1.02	0
6052	1	59	22	25.9515570934256	0	0	0	44	37	39	40.4	223	1.09	0
6055	0	55	72	25.390625	0	0	0	22	21	65	40.2	297	1.14	0
6058	0	55	52	23.4375	0	0	0	14	19	67	48.5	350	1.7	0
6059	0	55	32	18.3654729109275	0	0	0	22	27	83	44.6	411	1.17	0
6060	0	67	72	24.034609838167	0	0	0	16	20	61	36.7	261	1.28	0
6061	0	52	22	28.0403781445281	0	0	0	19	17	59	39	257	0.95	0
6062	0	53	42	23.4375	0	0	0	13	18	79	40	303	1.13	0
6069	0	68	32	19.9791883454735	1	1	1	17	19	133	36.8	388	1.13	0
6071	1	75	32	24.3417582863402	0	1	0	12	16	45	41.3	244	1.38	0
6072	0	83	52	20.1950922115531	0	0	0	12	16	70	38.3	281	1.06	0
6076	0	57	52	23.8751147842057	0	0	0	23	29	46	38.8	200	1.42	0
6077	0	71	52	28.393351800554	0	0	0	23	24	71	40.8	301	1.02	0
6079	0	51	22	20.703125	0	0	0	30	24	64	45	254	1.38	0
6080	0	55	32	24.034609838167	0	0	0	11	18	42	40.7	394	1.09	0
6081	0	60	42	20.6131310030262	0	0	0	14	14	50	41.6	216	1.61	0
6082	0	50	32	28.0403781445281	0	0	0	14	20	67	42.6	161	1.15	0
6084	1	55	32	27.7551020408163	0	0	0	32	45	75	43.5	244	1.18	0
6085	0	68	72	15.625	0	0	0	26	26	61	37.6	330	0.98	0
6090	0	58	42	23.828125	0	0	0	19	17	53	36.8	445	1.29	0
6091	0	58	42	24.034609838167	0	0	0	32	30	54	41.3	359	1.53	0
6093	0	59	42	25.2173585757838	0	0	0	89	62	49	39.3	283	1.22	0
6094	0	59	52	24.7675659198293	0	0	0	6	15	67	38.7	192	1.1	0
6105	0	66	42	23.7118446309609	0	0	0	26	35	49	42.7	167	1.43	0
6107	0	57	52	28.0957336108221	0	0	0	10	15	61	36.1	341	1.2	0
6110	0	81	72	22.1836419753086	0	0	0	40	47	60	37.9	106	1.27	0
6112	0	56	52	25.390625	0	0	0	33	17	47	37.1	213	1.2	0
6113	1	57	42	25.9515570934256	0	0	0	18	22	71	39.6	475	1.3	0
6120	1	51	32	26.7299274950717	0	0	0	29	25	42	42	349	1.14	0
6121	0	66	22	31.9284241919214	0	0	0	13	13	57	37.7	267	0.98	0
6124	0	55	22	26.5625	0	0	0	6	21	61	40.2	487	1.29	0
6126	0	66	32	23.191094619666	0	0	0	27	73	56	36.8	193	0.98	0
6128	0	54	52	24.4444444444444	0	0	0	22	20	46	39.6	263	1.5	0
6131	0	65	52	20.2020202020202	0	0	0	9	24	50	39.4	289	1.4	0
6135	1	56	32	25.6543723973825	0	0	0	130	117	40	35	275	1.32	0
6137	0	52	22	28.6214703746422	0	0	0	26	19	85	39.4	429	1.3	0
6141	0	77	72	26.6727632982777	0	0	0	17	20	35	38	203	1.28	0
6142	0	78	72	27.0551508844953	0	0	0	18	18	50	42.4	168	1.22	0
6145	0	86	22	24.034609838167	1	1	1	19	20	50	39.8	291	1.36	0
6146	1	52	32	26.7299274950717	0	0	0	104	106	77	43.2	311	1.47	0
6147	0	52	42	23.046875	0	0	0	12	11	94	37.7	438	0.82	0
6148	1	53	42	25.7116620752984	0	1	0	12	19	67	34.5	203	1.28	0
6149	0	54	72	23.8751147842057	0	0	0	20	27	55	40.7	308	1.2	0
6150	1	57	42	23.0300453514739	0	0	0	13	11	89	37.2	288	1	0
6151	0	56	32	22.8928199791883	0	0	0	10	16	67	40.1	307	0.87	0
6152	1	56	52	26.9896193771626	0	0	0	49	28	57	41.9	397	0.98	0
6155	1	59	22	22.9481157445588	0	0	0	10	23	74	42.8	320	1.33	0
6157	0	77	72	22.4323025156225	1	1	1	18	21	49	40.7	111	0.96	0
6159	0	64	32	26.4380708219837	0	0	0	22	38	77	39.8	311	1.18	0
6162	1	59	42	20.7612456747405	0	0	0	14	18	50	36.7	295	1.36	0
6165	0	62	72	22.6002629848784	0	0	0	15	21	50	39.7	195	1.14	0
6168	1	56	52	25.2493372048984	0	0	0	19	23	45	31.2	176	1.18	0
6169	1	52	42	19.7231833910035	0	0	0	15	19	40	43.1	312	1.29	0
6174	0	66	52	23.4375	0	0	0	10	12	65	42.8	280	1.01	0
6178	1	68	22	25.4619806334632	0	0	0	21	27	71	45	381	1.13	0
6180	0	75	72	24.034609838167	0	0	0	18	31	72	39.6	381	1.25	0
6181	0	54	42	25.7116620752984	0	0	0	16	17	52	40	244	1.08	0
6182	0	53	42	24.7409372871024	0	0	0	30	25	69	30.6	173	1.04	0
6184	1	55	72	24.2214532871972	0	0	0	14	15	52	46.6	228	1.34	0
6189	0	66	72	24.034609838167	0	0	0	25	18	56	42.9	283	1.44	0
6190	0	66	72	22.5827091723437	1	0	0	49	32	57	34.3	285	1.09	0
6191	1	54	42	21.4691504822301	0	0	0	33	33	44	36	205	1.5	0
6195	1	51	32	24.2214532871972	0	0	0	18	33	73	43.5	342	0.91	0
6198	1	58	32	29.0657439446367	0	0	0	14	18	41	38.3	148	1.59	0
6200	0	63	72	26.0374939913475	0	0	0	20	23	41	36.9	126	1.44	0
6215	0	66	72	20.829995193078	0	0	0	14	16	39	38.3	314	1.14	0
6216	0	64	52	24.7675659198293	0	0	0	14	29	45	36.9	99	1.07	0
6217	0	83	72	20.8116545265349	1	0	0	16	29	73	34	390	0.9	0
6219	1	65	52	21.5138585105239	0	0	0	36	29	58	43.6	443	1.36	0
6220	1	60	32	25.9515570934256	0	0	0	120	320	49	34.4	261	0.63	0
6223	1	59	42	24.2214532871972	0	0	0	38	45	41.7	47	285.4	1.42	0
6225	1	67	72	16.6089965397924	1	0	0	17	19	48	36.5	235	1.33	0
6228	0	60	32	27.5555555555556	2	0	0	13	19	74	34.3	332	0.89	0
6231	0	51	52	23.4375	0	0	0	40	45	85	39.2	361	1.07	0
6232	0	54	42	23.0111768573307	0	0	0	30	17	53	40.6	269	1.34	0
6233	0	55	32	23.7812128418549	0	0	0	18	32	40	34.2	246	0.97	0
6234	0	58	42	28.2283864654296	0	0	0	8	11	428	25.8	285	1.29	0
6235	0	60	52	24.034609838167	0	0	0	15	19	59	40.6	270	1.06	0
6236	0	61	52	20.8116545265349	0	0	0	10	20	87	41.7	402	0.97	0
6237	0	63	42	23.046875	0	0	0	11	17	114	29.1	309	1	0
6239	1	64	72	21.7180660897457	1	0	1	21	19	69	44	444	1.47	0
6240	0	65	52	21.09375	0	0	0	13	20	62	36.1	291	1.03	0
6241	1	65	72	22.4087867693473	1	1	0	121	125	62	43	314	1.21	0
6242	0	66	52	20.0288415318058	0	0	0	9	18	54	40.1	209	1.19	0
6245	0	68	32	18.7304890738814	1	1	1	12	18	42	36.2	176	1.6	0
6249	0	83	72	21.7437737622282	2	1	0	37	61	58	46.1	342	1.16	0
6250	0	83	72	19.53125	1	1	0	28	73	84	39.9	328	1.02	0
6251	0	88	72	22.8928199791883	0	0	0	11	18	82	39.3	370	0.93	0
6258	0	50	52	22.8623685413809	0	0	0	16	22	43	36.9	169	0.45	0
6262	1	51	22	21.8299521999323	0	0	0	10	16	66	44.5	494	1.59	0
6263	1	52	52	24.0740740740741	0	0	0	37	56	53	32.9	118	1.38	0
6264	0	52	32	25.2363403300753	0	0	0	11	22	83	34.9	383	1.2	0
6265	0	52	52	20.3125	1	0	0	19	25	94	38.5	218	1.1	0
6266	0	53	52	24.034609838167	0	0	0	37	30	67	37.1	201	1.04	0
6268	0	53	32	28.2828282828283	0	0	0	18	20	87	42.5	325	1.06	0
6272	1	53	42	19.252619618735	0	0	0	20	16	55	43	388	0.9	0
6273	1	54	42	26.5731292517007	0	0	0	19	18	65	40.9	273	0.94	0
6274	0	54	42	24.8777196829145	0	0	0	23	18	74	40.5	431	1.24	0
6275	1	54	42	23.6712536295922	0	0	0	19	22	51	42.4	271	1.47	0
6280	0	54	72	19.4875889098563	0	0	0	12	19	79	35.6	335	0.97	0
6284	0	54	52	21.484375	0	0	0	15	19	70	38.9	239	1.19	0
6285	0	54	42	26.2222222222222	0	0	0	16	18	54	43.1	256	1.22	0
6286	0	54	42	24.2424242424242	0	0	0	9	17	64	40.3	238	1.26	0
6287	0	55	22	20.3954214360042	0	0	0	15	22	47	36.5	272	1	0
6288	0	54	32	23.191094619666	0	0	0	15	23	54	37	286	1.64	0
6292	0	55	42	25.4766600920447	0	0	0	15	19	127	39.4	297	0.96	0
6293	0	55	42	22.8623685413809	0	0	0	22	24	62	47.5	412	1.3	0
6295	0	55	72	22.0385674931129	0	0	0	11	23	74	37.2	291	1.04	0
6297	1	54	22	31.2213039485767	0	0	0	22	17	57	41.8	399	1.04	0
6300	1	55	52	25.0593070266297	0	0	0	50	24	42	41.2	250	1.46	0
6302	1	55	42	25.9515570934256	0	0	0	10	14	48	34.6	262	1.08	0
6304	0	56	72	18.359375	0	0	0	18	37	72	35.8	198	1.01	0
6305	1	56	72	24.8015873015873	0	0	0	41	27	87	50.6	529	1.28	0
6306	1	56	52	21.3039485766759	0	0	0	21	23	97	37.1	521	0.99	0
6307	0	56	42	22.2222222222222	0	0	0	16	13	65	37.3	282	1.4	0
6308	0	55	42	24.4444444444444	0	0	0	25	29	48	44.5	232	1.23	0
6311	1	56	22	17.3010380622837	0	0	0	18	20	43	39.6	379	1.01	0
6312	1	57	42	22.98190175237	0	0	0	21	31	75	35.6	298	0.77	0
6313	1	56	42	24.2214532871972	0	1	0	19	19	76	34.3	353	0.99	0
6315	1	56	52	20.5693296602388	0	0	0	24	32	60	45.6	297	1.2	0
6323	0	57	52	24.609375	0	0	0	8	14	66	31.5	238	0.89	0
6325	0	57	52	20.3125	0	0	0	11	14	56	40.4	72	0.93	0
6330	1	57	42	24.2214532871972	0	0	0	25	29	78	36.8	359	0.59	0
6331	1	57	72	24.023808670085	0	0	0	28	24	91	32.8	337	0.99	0
6332	1	57	42	25.2595155709343	0	0	0	13	17	56	34.9	186	0.9	0
6335	0	58	52	22.6002629848784	0	0	0	9	15	99	35.5	277	1.15	0
6337	0	57	22	23.7252861602497	0	0	0	12	13	50	40.3	433	1.41	0
6340	0	57	42	19.53125	0	0	0	19	19	62	42.4	310	1.6	0
6342	0	58	52	20.2020202020202	0	0	0	15	22	90	38.9	357	1.17	0
6343	0	58	42	24.8015873015873	0	0	0	10	18	135	36.2	715	1.11	0
6344	0	58	52	25.7116620752984	0	0	0	26	35	48	46.5	327	1.35	0
6346	0	58	42	21.3675213675214	0	0	0	32	27	67	41.6	278	1.27	0
6348	0	58	42	24.4444444444444	0	0	0	17	21	64	44.2	260	1.35	0
6353	0	59	32	18.8271110398975	0	0	0	9	13	56	42.5	200	1.46	0
6356	0	59	42	28.9993074792244	0	0	0	16	22	64	37.4	233	1.31	0
6357	1	59	42	22.3214285714286	0	0	0	11	17	42	41.5	269	1.37	0
6359	0	59	32	24.3865264441396	0	0	0	20	19	51	31	227	0.67	0
6360	1	59	42	24.2214532871972	0	0	0	18	19	50	41.4	196	2	0
6362	1	59	42	24.8015873015873	1	1	0	24	27	64	37	218	1.03	0
6363	0	59	52	23.7252861602497	0	0	0	22	34	63	37.3	260	1.09	0
6365	0	59	72	28.0403781445281	0	0	0	17	20	61	40.7	271	1.1	0
6366	0	59	52	22.265625	0	0	0	13	21	81	44.7	434	1.36	0
6371	0	59	52	26.9896193771626	0	0	0	22	21	60	40.5	344	1.2	0
6373	1	59	72	25.390625	0	0	0	14	24	66	39.1	231	1.54	0
6375	0	59	32	22.0317256849864	0	0	0	39	27	72	48.7	293	1.46	0
6376	1	59	52	27.681660899654	0	0	0	48	30	86	44.3	372	1.16	0
6382	0	59	22	24.1671624033313	0	0	0	89	45	56	37.7	189	1.28	0
6383	0	60	42	22.0317256849864	0	0	0	46	57	64	17.8	272	0.8	0
6386	0	59	42	22.0317256849864	0	0	0	12	18	79	41.8	126	1.32	0
6387	0	59	52	21.8299521999323	0	0	0	23	25	45	39.6	325	1.14	0
6389	0	60	52	19.53125	0	0	0	44	26	66	43.4	301	1.56	0
6391	0	59	32	21.9261258222297	0	0	0	14	19	63	41.2	265	1.23	0
6392	1	60	42	23.0300453514739	0	0	0	16	15	56	38.4	355	1.26	0
6394	1	60	32	22.7583067819754	0	0	0	29	37	95	40.9	536	1.38	0
6397	1	60	42	24.4897959183673	0	0	0	12	21	56	44.1	289	1.13	0
6401	0	61	72	15.5555555555556	3	0	0	32	29	55	44.3	388	1.29	0
6403	0	61	22	21.8299521999323	0	0	0	25	26	57	31.8	261	1.25	0
6406	0	61	42	26.3702381435352	0	0	0	21	26	44	38.1	153	1.13	0
6407	0	61	32	29.1363163371488	0	0	0	13	25	76	40	499	1.46	0
6410	0	62	52	23.4375	0	0	0	18	22	64	38.6	287	1.5	0
6413	0	62	72	23.4375	0	0	0	22	20	82	39.7	233	1.1	0
6415	0	62	42	19.9791883454735	0	0	0	20	21	81	39.5	310	1.11	0
6416	1	63	32	22.1297397278372	0	0	0	32	47	61	43.7	247	1.61	0
6419	1	63	72	24.2214532871972	0	0	0	15	19	66	40.5	333	1.24	0
6420	0	63	42	25.7777777777778	0	0	0	12	20	57	45	292	1.46	0
6421	1	63	22	21.2244897959184	0	0	0	14	23	49	43.2	290	0.94	0
6422	0	63	42	32.8473001121615	0	0	0	13	13	65	41	284	1.04	0
6423	0	64	42	16.8918918918919	0	0	0	27	23	44	44.1	241	1.39	0
6424	0	64	42	27.34375	0	0	0	18	23	70	41.4	319	0.94	0
6428	1	64	72	23.703651832919	0	0	0	65	35	78	34.3	151	0.8	0
6432	0	64	42	20.5456936226167	0	0	0	20	25	48	40.4	305	1.53	0
6435	1	65	52	28.3987180007303	0	0	0	12	20	95	35.1	472	1.13	0
6443	1	65	52	24.2214532871972	0	1	0	11	17	102	33	285	1.25	0
6444	0	65	42	23.8751147842057	0	0	0	103	171	95	32.2	310	0.59	0
6448	1	65	42	22.2974590472282	0	0	0	14	18	40	42.9	211	1.35	0
6450	1	65	42	21.484375	0	0	0	10	14	72	44.2	236	1.41	0
6451	0	65	42	22.8928199791883	0	0	0	30	34	73	33.9	302	0.9	0
6452	1	65	42	27.0051309748852	0	0	0	39	25	63	52	522	1.27	0
6460	0	66	32	16.0230732254446	6	0	0	25	21	38	40.5	291	1.19	0
6463	0	66	52	20.0288415318058	0	1	0	35	20	62	48	394	1.29	0
6465	0	66	42	25.2993759487266	0	0	0	19	19	54	41.6	242	1.02	0
6466	1	66	32	22.7583067819754	0	0	0	33	40	85	37.3	373	1.07	0
6470	1	65	72	20.7008167413151	0	0	0	19	21	86	39	303	0.97	0
6472	0	66	72	23.4375	0	0	0	12	20	38	35.2	190	1.51	0
6475	0	66	42	23.1385071035217	0	0	0	11	20	56	39.6	275	1.2	0
6477	0	66	22	24.4444444444444	0	0	0	16	19	47	34.3	192	1.35	0
6479	1	67	72	26.9274376417234	0	0	0	16	22	67	42.3	261	1.48	0
6480	1	66	22	21.4532871972318	0	0	0	11	15	59	47.3	346	0.96	0
6482	0	67	42	19.53125	0	0	0	84	33	71	44	377	1.15	0
6484	0	67	42	29.296875	0	1	0	29	22	38	42.6	331	1.75	0
6486	0	67	32	24.65483234714	0	0	0	24	55	71	42.7	302	1.6	0
6487	0	67	42	24.3417582863402	0	0	0	15	30	78	43.9	348	1.23	0
6490	0	67	22	29.4321329639889	1	1	1	15	31	50	38.4	293	1.43	0
6494	1	67	22	27.34375	0	0	0	15	14	32	36.1	173	1.27	0
6495	0	68	32	21.7777777777778	0	0	0	16	19	49	40.7	203	1.38	0
6498	1	68	42	22.0385674931129	1	1	1	67	42	56	46.5	517	1.33	0
6501	0	67	52	17.4747174301011	0	0	0	11	18	82	35.7	378	1.04	0
6504	0	68	32	20.0288415318058	0	0	0	21	21	31	40.9	234	1.39	0
6505	0	68	22	27.5555555555556	0	0	0	10	14	68	39.2	281	1.31	0
6506	0	68	42	27.4348422496571	0	0	0	21	21	68	43.9	350	1.66	0
6507	0	67	32	21.2305720237141	0	0	0	112	40	35	41.8	198	1.17	0
6509	1	68	22	20.7612456747405	0	0	0	22	28	106	36.4	329	1.03	0
6511	0	67	42	26.6666666666667	0	1	0	21	21	63	44.1	331	1.32	0
6516	1	67	22	24.034609838167	0	0	0	59	70	102	31	282	1.22	0
6520	1	68	22	24.023808670085	0	0	0	31	81	70	38.3	252	0.96	0
6521	0	68	52	25.6369171607114	0	0	0	20	38	57	42.1	351	1.15	0
6523	0	68	32	25.390625	0	1	0	17	17	89	38.8	286	1.05	0
6524	0	68	52	23.828125	0	0	0	22	20	51	36.4	126	1.13	0
6525	0	68	32	23.0111768573307	1	1	0	13	16	69	40.4	220	1.29	0
6527	0	67	32	24.4444444444444	1	0	0	28	25	64	43.6	329	1.12	0
6528	0	68	52	29.4321329639889	0	0	0	16	27	63	37.8	281	1.42	0
6529	0	68	52	22.8928199791883	0	0	0	22	18	76	42.9	365	0.97	0
6532	0	68	22	25.7116620752984	0	0	0	18	26	38	40.5	301	1.52	0
6533	0	68	52	25.390625	0	0	0	20	30	69	45	295	1.17	0
6534	0	68	32	20.4294183624419	0	0	0	20	26	59	34.3	299	1.5	0
6539	1	68	42	29.1363163371488	0	0	0	18	14	53	39.8	190	1.52	0
6541	0	68	32	24.1671624033313	0	0	0	21	23	46	37.8	252	1.27	0
6542	1	68	72	22.1487603305785	0	0	0	11	17	67	39.3	367	1.05	0
6543	0	68	42	28.0403781445281	0	0	0	13	17	62	40.8	184	1.37	0
6544	0	69	52	18.6666666666667	0	0	0	49	31	48	38.1	305	0.99	0
6545	0	68	42	24.3141239657425	0	0	0	16	22	50	37.7	249	1.38	0
6548	1	68	72	19.53125	0	0	0	26	26	65	42.2	169	1.3	0
6549	0	68	42	23.1084345786212	0	0	0	9	17	57	42.4	189	1.34	0
6550	1	68	32	23.5294117647059	0	0	0	14	24	60	45.3	229	1.52	0
6551	0	68	32	22.5827091723437	0	0	0	38	46	61	47.1	361	1.37	0
6553	0	68	42	26.171875	0	0	0	17	17	59	38.4	282	1.22	0
6554	0	68	42	19.9791883454735	0	0	0	16	23	53	36.9	279	1.02	0
6556	1	69	42	25.0995015956112	0	0	0	13	15	54	37.8	230	1.55	0
6558	0	69	42	27.4756294930182	0	0	0	11	16	89	32.2	315	0.96	0
6559	0	69	52	24.4444444444444	0	0	0	15	21	63	37.2	281	1.14	0
6560	0	69	52	24.21875	1	1	1	13	19	80	35.8	335	1.22	0
6561	0	69	42	21.0828132906055	0	0	0	12	19	48	42.9	210	1.36	0
6562	0	69	32	20.8116545265349	0	0	0	9	28	116	38	345	0.79	0
6565	0	69	32	31.1111111111111	0	0	0	13	19	48	42.2	191	1.47	0
6566	1	69	72	22.0385674931129	0	0	0	17	30	67	41	328	1.81	0
6567	0	69	42	19.53125	0	0	0	19	14	78	42.3	377	1.11	0
6568	1	69	32	30.1162131519274	1	0	1	16	16	52	37.8	277	1.16	0
6571	0	69	72	18.7652467629949	0	0	0	16	18	97	44.5	459	1.1	0
6572	0	69	72	18.7652467629949	0	0	0	27	30	55	44.6	321	1.19	0
6573	1	69	72	23.1206235962479	0	0	0	17	20	69	42.9	218	1.31	0
6574	0	69	32	19.53125	0	0	0	14	19	74	39.3	272	1.08	0
6575	0	69	32	23.046875	1	1	1	21	26	74	42.2	285	1.33	0
6576	1	70	52	19.7776986669831	0	0	0	22	19	74	38.2	327	1.04	0
6577	0	70	72	23.4375	0	0	0	22	23	53	36	178	1.34	0
6578	0	69	42	21.7738423573813	0	0	0	38	36	35	41.5	136	1.23	0
6579	1	70	42	27.34375	0	0	0	51	63	66	43.8	454	1.1	0
6584	1	69	32	24.9770431588613	0	0	0	11	21	48	38.8	219	1.6	0
6586	1	69	42	27.2392244832559	0	0	0	44	29	71	40.8	366	1.24	0
6587	0	70	32	23.4952368747063	0	0	0	21	21	64	43.5	336	1.09	0
6588	0	69	72	23.4375	1	1	0	23	17	77	36.3	362	0.8	0
6589	0	70	32	24.3417582863402	0	0	0	20	21	99	30	297	1.01	0
6591	0	70	22	26.2984878369494	6	1	0	9	19	61	37.3	214	1.13	0
6592	1	70	42	16.8962350780533	0	0	0	19	18	106	40.4	247	0.99	0
6593	1	69	42	24.9142857142857	0	1	0	30	36	63	39.7	292	1.23	0
6596	1	69	42	27.34375	0	0	0	18	25	53	42.7	329	1.11	0
6597	0	69	52	29.5525494276795	0	0	0	21	29	56	46.3	189	1.27	0
6598	0	69	72	24.9739854318418	0	0	0	103	116	76	41.1	334	1.9	0
6600	0	70	52	22.8928199791883	0	0	0	8	13	51	36.8	281	1.19	0
6601	1	70	52	15.7943067033976	0	0	0	6	8	54	36.8	207	0.89	0
6602	0	70	22	22.8623685413809	0	0	0	67	55	67	39.3	242	1.14	0
6605	0	70	32	23.0111768573307	0	0	0	17	19	42	42.7	267	1.3	0
6606	0	70	72	26.0261748958953	0	1	0	26	17	39	41	152	1.5	0
6607	0	70	52	28.0403781445281	0	0	0	14	15	46	39.1	248	1.1	0
6612	0	70	22	23.4375	0	0	0	15	16	70	42.1	334	1.31	0
6614	0	70	52	24.8015873015873	1	0	1	38	41	69	45.8	379	1.33	0
6618	0	71	72	27.5873260578522	0	0	0	25	18	60	35.6	209	1.21	0
6620	0	70	22	22.6666666666667	0	0	0	14	17	44	35.7	183	1.16	0
6622	0	70	42	19.9791883454735	1	0	0	36	35	43	44.6	232	1.4	0
6623	0	70	32	26.6666666666667	0	0	0	10	11	47	36.1	223	1.49	0
6625	0	71	42	20.4294183624419	1	0	1	18	20	39	35	131	1.22	0
6629	0	71	32	20	0	0	0	21	30	45	41.2	292	1.08	0
6631	1	71	32	23.6614386154678	0	0	0	24	24	46	40.6	146	1.5	0
6634	0	72	52	20.8116545265349	0	0	0	8	12	50	33.3	206	1.05	0
6636	1	71	72	24.9680097375238	8	1	0	14	19	45	45.5	210	1	0
6639	0	71	22	31.244992789617	0	0	0	24	20	47	39.7	270	1.47	0
6640	0	71	32	22.3081499107674	0	0	0	29	26	46	42	246	1.09	0
6642	0	71	42	20	0	0	0	27	27	49	44.6	270	1.45	0
6643	1	71	52	20.2020202020202	0	0	0	7	17	62	36	212	1.25	0
6646	0	72	72	21.9288627691768	0	0	0	13	16	44	43.2	236	1.17	0
6647	0	72	52	27.4348422496571	0	0	0	34	28	66	38.5	405	1.18	0
6649	0	72	52	25.2363403300753	0	0	0	18	23	76	43.3	379	1.28	0
6650	0	72	52	24	0	0	0	9	15	59	43.6	279	1.41	0
6652	0	72	32	28	2	1	1	18	16	50	37.4	260	1.29	0
6653	0	73	42	24.5577523413111	0	0	0	20	25	65	41.9	253	1.01	0
6654	0	72	42	25.390625	0	0	0	13	20	43	37	323	1.01	0
6656	0	72	72	25.2993759487266	1	0	1	26	49	44	40.1	160	1.37	0
6658	0	72	22	21.0771952275208	0	0	0	26	30	43	39.7	151	1.29	0
6661	0	72	32	24.2424242424242	0	1	0	29	31	59	37.1	199	1.2	0
6664	1	73	52	19.4869614512472	0	1	0	21	22	76	33.7	158	0.93	0
6665	0	72	42	25.2240890049998	0	0	0	22	18	62	39.7	335	1.64	0
6667	0	73	32	23.0680507497116	0	0	0	24	18	39	41.6	328	1.49	0
6669	0	73	22	22.6002629848784	0	0	0	20	16	55	45.4	185	0.94	0
6672	0	73	42	24.4444444444444	0	0	0	16	17	47	39.1	194	1.2	0
6676	0	73	72	20.8116545265349	0	0	0	16	17	43	43.8	164	1.15	0
6677	1	72	72	24.6097337006428	0	0	0	23	24	66	42	163	1.25	0
6680	0	73	42	20.8116545265349	0	0	0	15	22	50	37.3	210	0.84	0
6681	0	73	32	24.4351866688031	0	0	0	15	14	42	35	201	0.9	0
6683	0	73	72	31.25	2	1	1	13	17	48	35	210	1.06	0
6691	0	73	42	18.2898948331047	0	0	0	7	13	58	35.8	302	1.38	0
6694	0	73	22	17.3484295105917	0	0	0	28	32	44	34.8	302	1.29	0
6696	0	74	72	27.34375	0	0	0	15	17	56	42.1	280	1.15	0
6697	0	74	52	26.6666666666667	0	0	0	10	15	76	38.5	327	1.42	0
6698	0	74	32	17.578125	0	0	0	12	16	45	38.9	198	1.19	0
6700	0	74	72	24.4444444444444	1	0	0	24	30	48	48.3	399	1.58	0
6702	0	74	32	18.7304890738814	0	0	0	45	31	69	41.1	524	1.24	0
6704	0	75	32	21.6441207075963	0	0	0	24	18	43	36.6	177	1.17	0
6708	0	74	52	27.0551508844953	0	0	0	12	17	51	41.5	249	0.85	0
6709	1	74	72	23.4375	0	0	0	35	19	72	46.7	431	1.13	0
6710	0	75	32	20.5456936226167	0	0	0	10	19	63	37.1	286	1.11	0
6712	1	75	32	21.7993079584775	0	0	0	31	15	92	46	345	1.18	0
6713	1	75	72	22.4913494809689	1	1	0	11	18	64	38	217	1.35	0
6714	0	75	72	16.6493236212279	0	0	0	20	19	65	46.3	296	1.24	0
6715	1	76	32	24.1588179685585	0	0	0	50	40	76	44.1	365	0.95	0
6717	0	75	22	25.3333333333333	0	1	0	29	33	64	39.7	391	1.02	0
6720	0	75	42	24.609375	1	1	1	15	16	56	40.1	219	1.05	0
6722	0	75	42	19.9791883454735	0	0	0	6	16	49	36	220	1.25	0
6725	1	76	72	17.9591836734694	0	1	0	15	27	50	43.8	214	1.06	0
6728	0	76	72	20.5456936226167	0	1	0	61	55	70	45.8	280	1.46	0
6734	0	76	32	26.6666666666667	0	0	0	34	26	67	47.8	365	1.6	0
6735	0	76	52	21.6412742382271	0	0	0	26	18	49	43.9	293	1.16	0
6737	0	76	32	24.4646016033724	0	0	0	12	16	76	41	238	1.05	0
6738	0	76	72	20.703125	0	0	0	12	20	79	42.6	265	1.51	0
6740	1	77	72	22.0317256849864	2	0	0	17	21	72	41.5	184	1.33	0
6742	0	77	72	20.8116545265349	0	0	0	14	17	53	47.4	256	1.39	0
6744	1	77	22	20.5498866213152	0	0	0	28	21	53	41.2	203	1.45	0
6745	1	77	22	25.8645124716553	1	0	0	17	15	124	47.1	222	1.37	0
6747	0	76	42	21.484375	0	0	0	24	26	44	42.3	384	1.25	0
6748	0	77	22	22.2222222222222	0	0	0	13	17	51	43.9	258	1.45	0
6749	0	76	72	16.6493236212279	0	0	0	19	27	72	37.4	372	0.93	0
6752	0	77	22	20.6367059513913	0	1	0	22	21	47	34	209	1.07	0
6753	0	77	32	18.7304890738814	0	0	0	14	19	84	37.2	177	0.79	0
6755	0	76	22	26.897670187097	1	1	1	22	19	54	36.7	111	1.83	0
6756	0	77	22	24.4444444444444	0	1	0	14	17	42	44.7	238	1.31	0
6760	1	77	72	21.7180660897457	0	0	0	21	24	55	41.3	299	1.43	0
6761	1	77	72	23.8751147842057	0	0	0	12	15	55	37.9	222	1.25	0
6763	0	78	42	21.2278876170656	0	0	0	29	22	52	49	186	1.32	0
6766	0	77	42	29.296875	0	0	0	13	19	79	42.6	338	1.19	0
6767	1	78	32	29.7339004102525	0	0	0	19	18	56	43.7	189	1.43	0
6769	0	78	72	23.4375	0	0	0	17	20	117	38.4	235	1.16	0
6770	0	78	32	22.5182961155939	0	0	0	18	20	61	40.2	288	1.18	0
6773	1	77	72	24.609375	1	0	0	51	31	52	46	419	1.09	0
6774	0	77	42	24.9739854318418	0	0	0	13	21	48	37.3	134	1.51	0
6776	0	78	72	27.0551508844953	0	0	0	17	17	48	35.2	194	1.1	0
6777	0	78	32	23.051754907793	6	0	0	9	14	56	41.3	371	1.29	0
6779	0	78	22	24.4444444444444	0	0	0	27	19	66	46.7	436	1.38	0
6780	0	78	32	19.53125	0	0	0	25	26	69	39.1	184	1.51	0
6781	1	78	72	17.6308539944904	1	1	0	21	25	65	41.7	257	1.44	0
6783	1	78	52	27.2508874466636	0	0	0	12	15	33	40.9	189	0.98	0
6787	0	78	52	20	0	0	0	25	16	55	40.8	369	1	0
6789	0	78	22	22.8928199791883	0	0	0	10	14	69	42.2	249	1.1	0
6790	0	78	72	21.484375	0	0	0	46	36	55	42.1	212	1.3	0
6791	0	78	32	23.8054016620499	0	1	0	21	18	44	38.4	190	1.06	0
6793	0	79	32	22.6002629848784	0	0	0	16	23	80	42.6	367	1.07	0
6800	0	79	32	24.7767952496903	0	1	0	19	25	40	43.7	195	0.96	0
6801	0	79	32	24.4444444444444	0	0	0	48	35	66	41.4	187	1.45	0
6802	0	78	72	21.5138585105239	0	0	0	30	23	100	34.6	376	0.93	0
6803	0	79	72	15.4006243496358	1	0	0	102	136	49	25.5	220	0.79	0
6805	0	79	72	20.0288415318058	0	0	0	28	24	55	33.2	282	0.77	0
6807	0	80	52	23.1111111111111	0	0	0	19	16	44	48.3	324	1.51	0
6809	1	80	72	19.4869614512472	2	0	1	13	14	41	39.5	171	1.37	0
6812	1	80	22	21.484375	0	1	0	10	20	59	40.5	236	1.33	0
6813	0	80	32	15.6012818350481	0	0	0	22	19	77	40.9	349	1.56	0
6814	0	80	52	26.6666666666667	0	0	0	25	24	61	37.6	246	1.37	0
6816	0	80	32	30.8185404339251	0	0	0	14	20	27	40.9	124	1.51	0
6817	0	80	22	20.4081632653061	0	0	0	13	16	44	39.9	192	1.05	0
6819	0	81	72	21.484375	0	1	0	12	16	103	45.8	211	0.97	0
6823	0	81	72	29.296875	2	0	1	18	22	60	35.4	278	1.08	0
[truncated: 109 more rows]
